# Supplementary material
Source: Royal Society of Chemistry journal article supplement (doi:10.1039/d6cp00867d)
Supplement: d6cp00867d4.pdf [file d6cp00867d4.pdf]

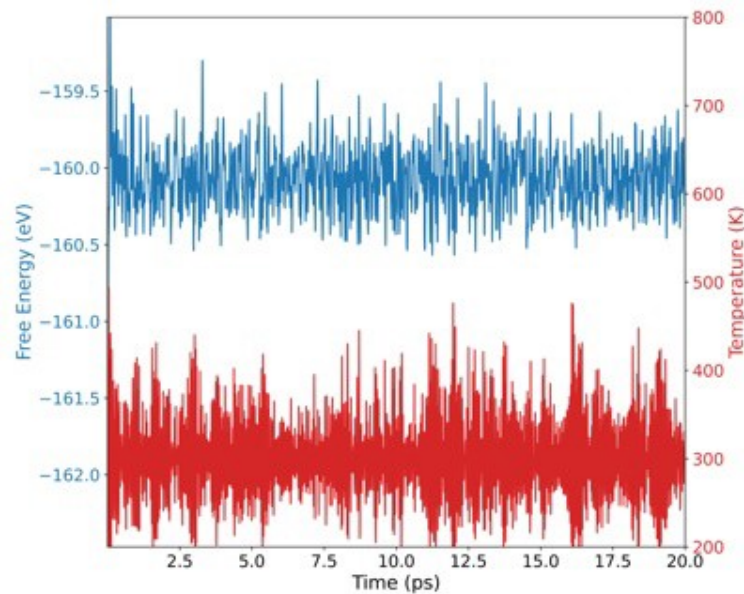

$\text{Al}_2\text{SeS}$

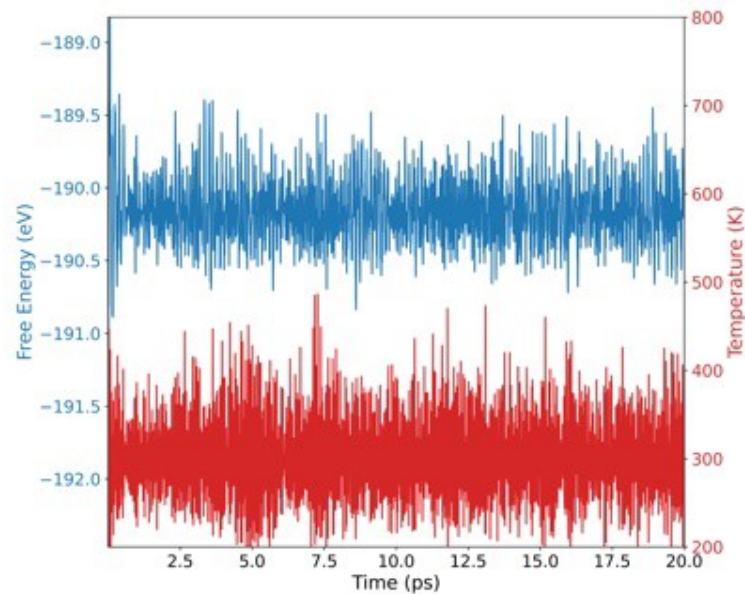

$\text{B}_2\text{SeS}$

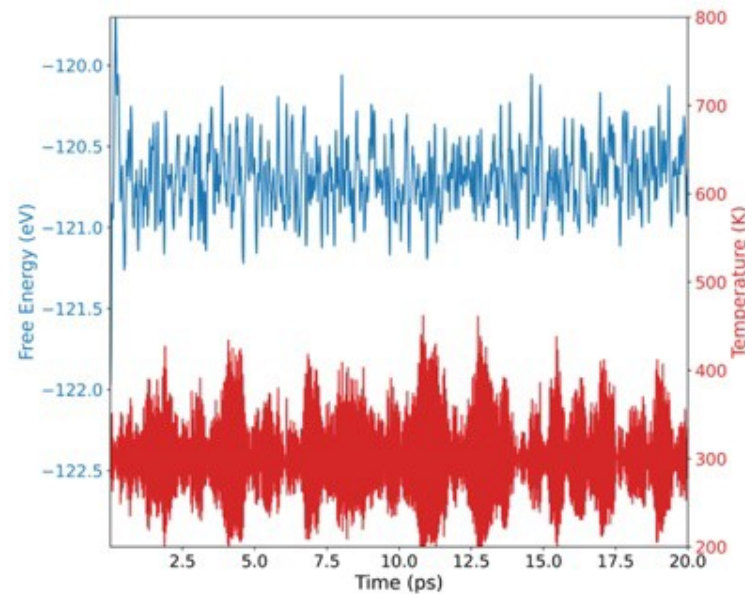

$\text{InGaTeSe}$

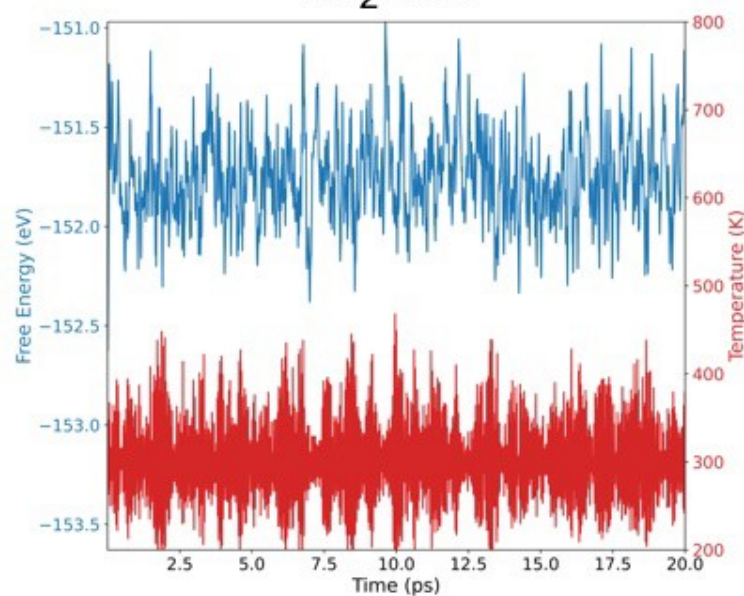

$\text{AlSbAs}_2$

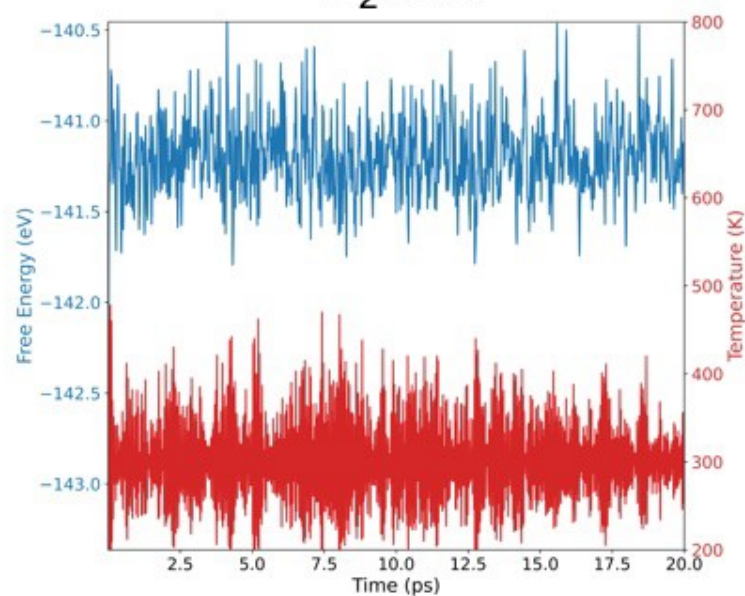

$\text{Al}_2\text{TeSe}$

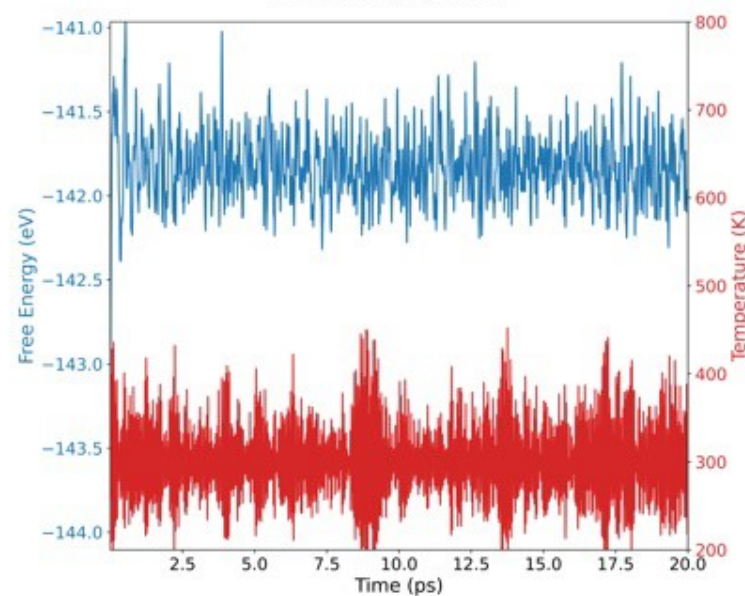

$\text{AlGaSe}_2$

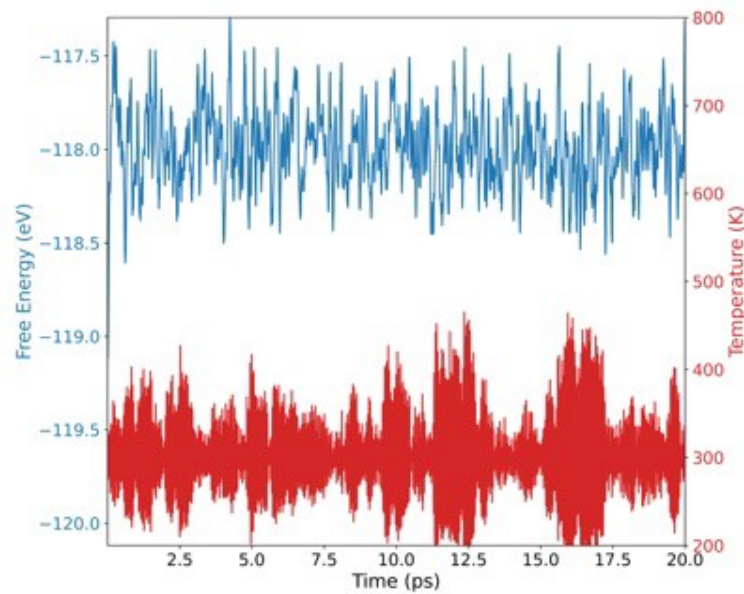

$\text{In}_2\text{TeSe}$
