# Supplementary material
Source: Royal Society of Chemistry journal article supplement (doi:10.1039/d6cp00867d)

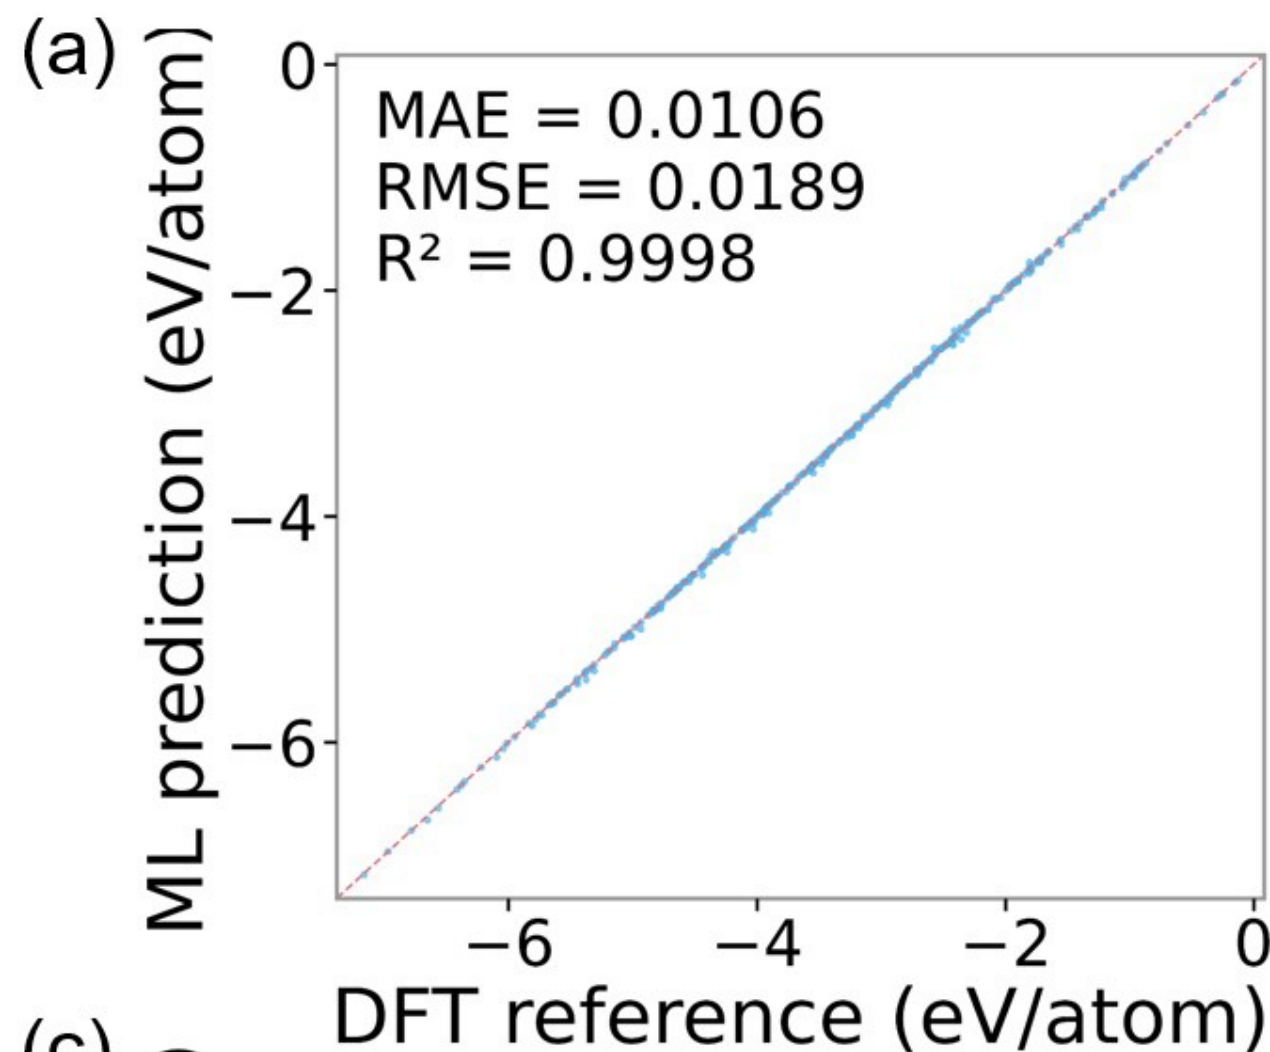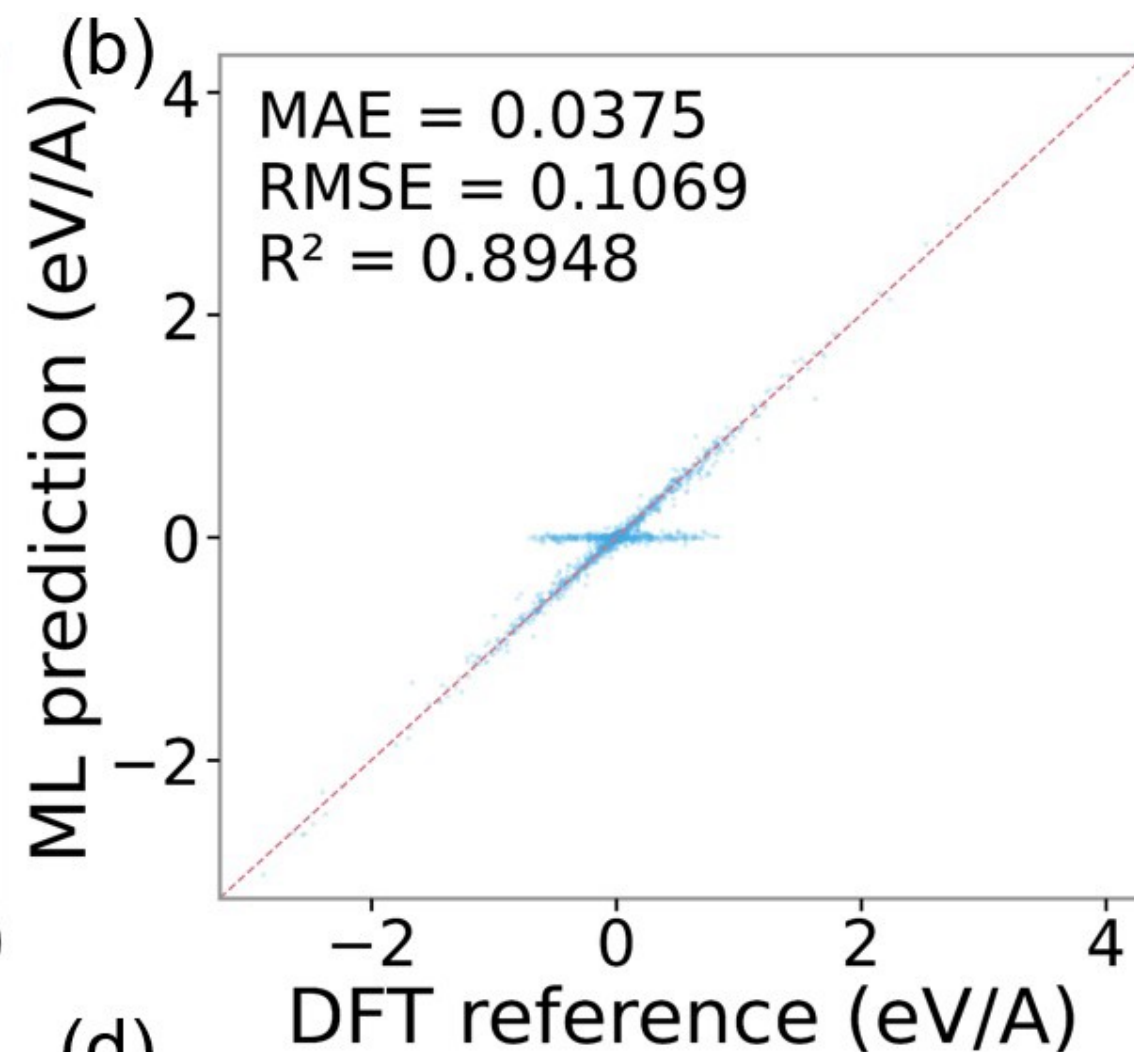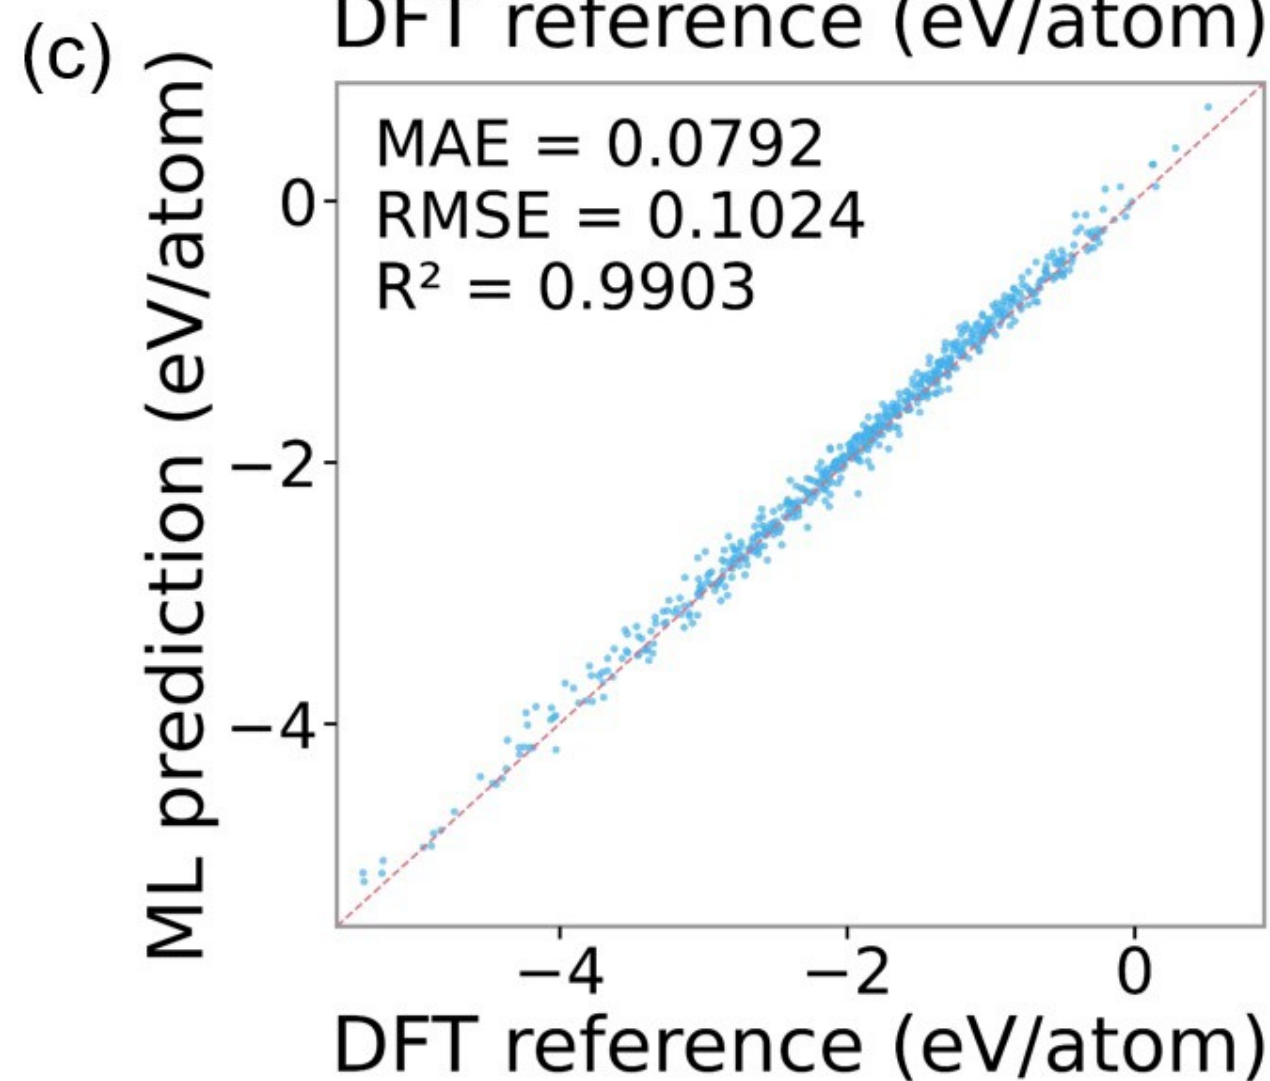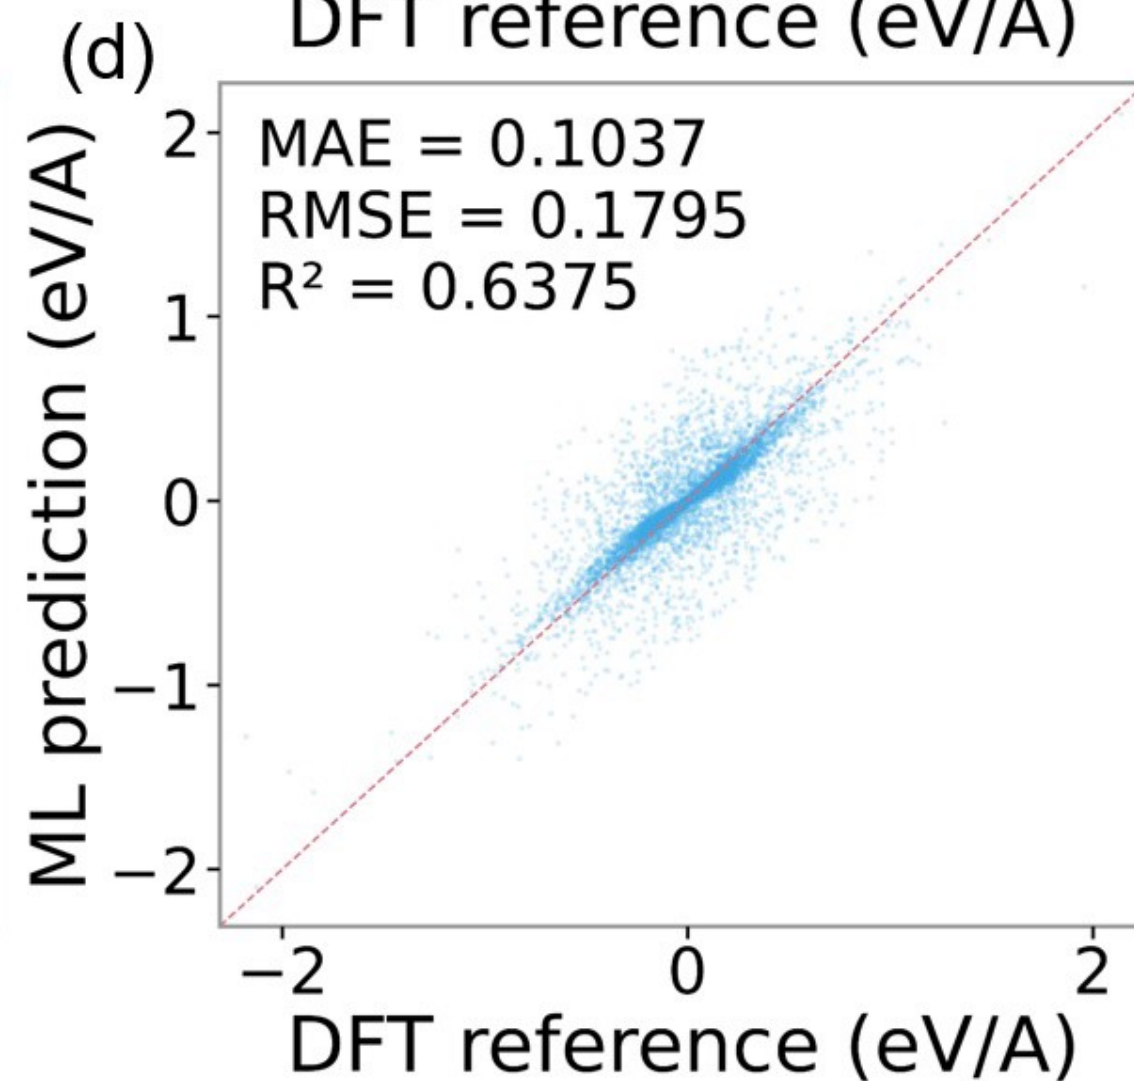

Supplement: d6cp00867d1.pdf [file d6cp00867d1.pdf]

### Al<sub>2</sub>TeSe SHG convergence behavior

—●— zzz —■— xxz

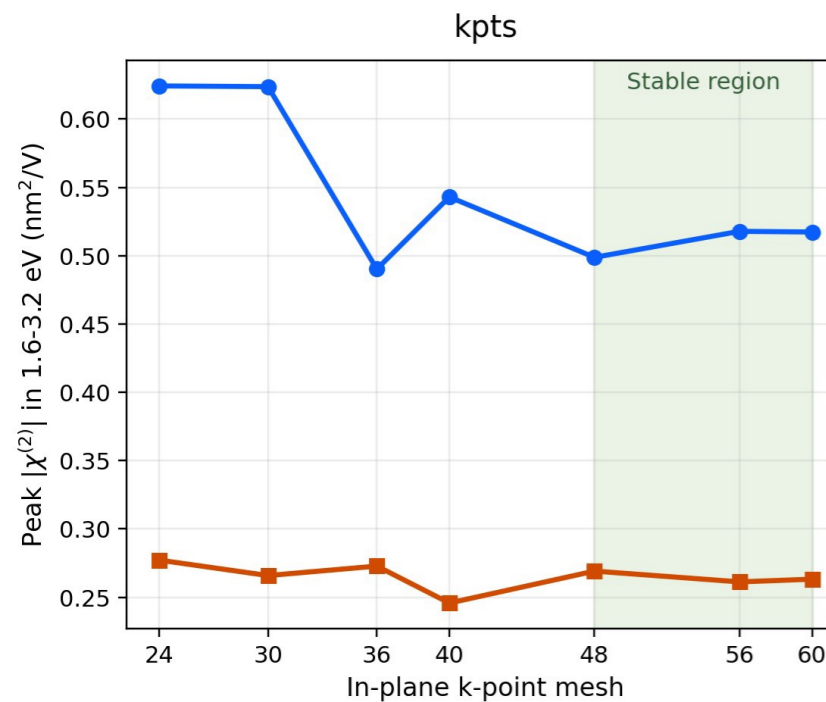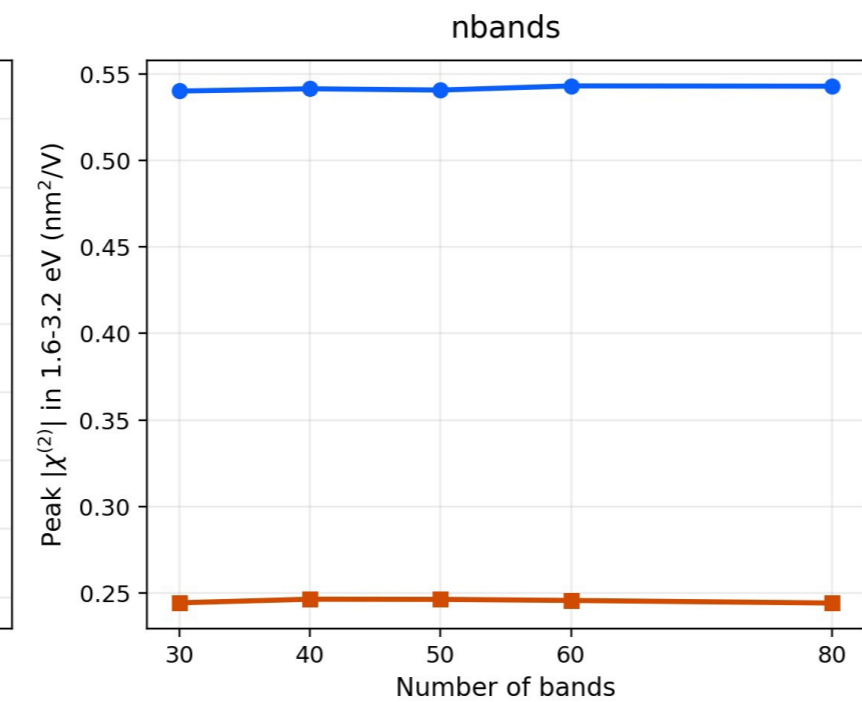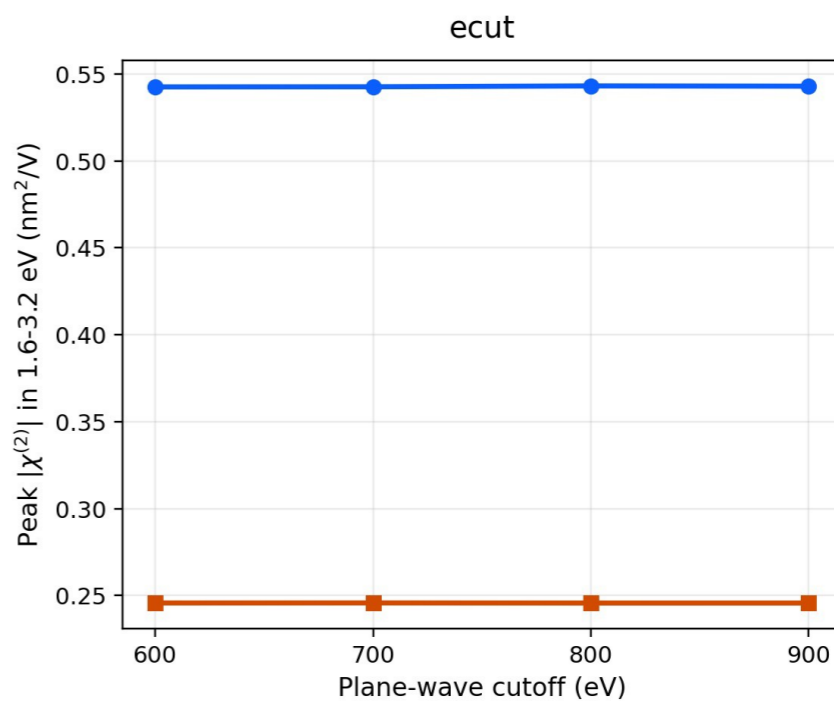

Supplement: d6cp00867d2.pdf [file d6cp00867d2.pdf]

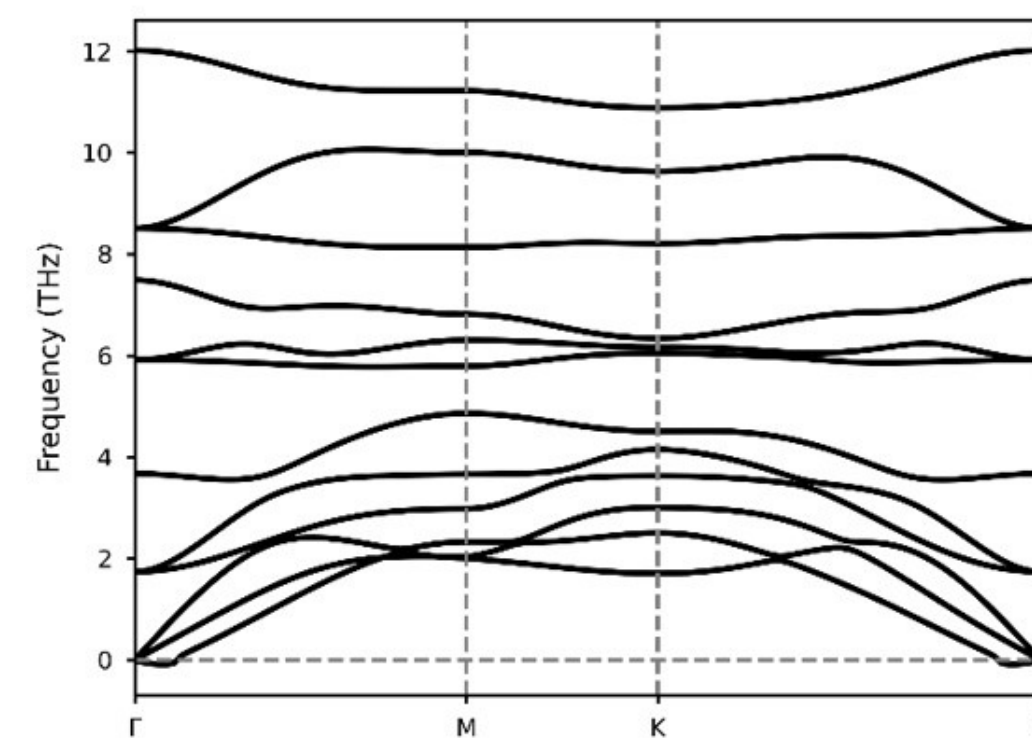

AlGaSe<sub>2</sub>

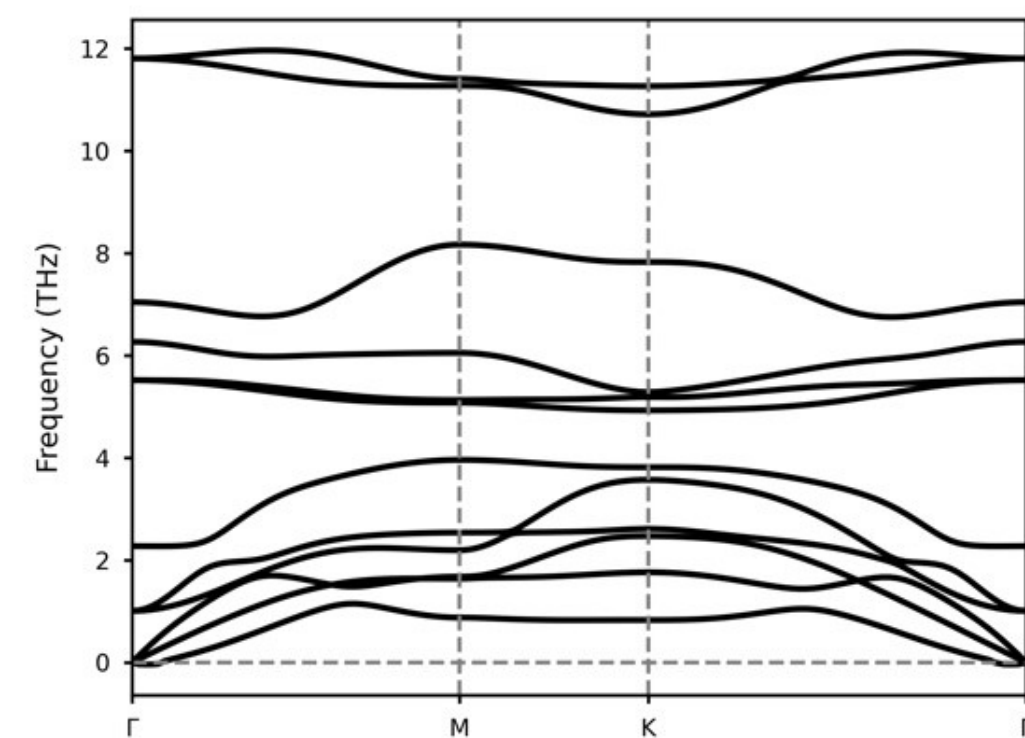

AlSbAs<sub>2</sub>

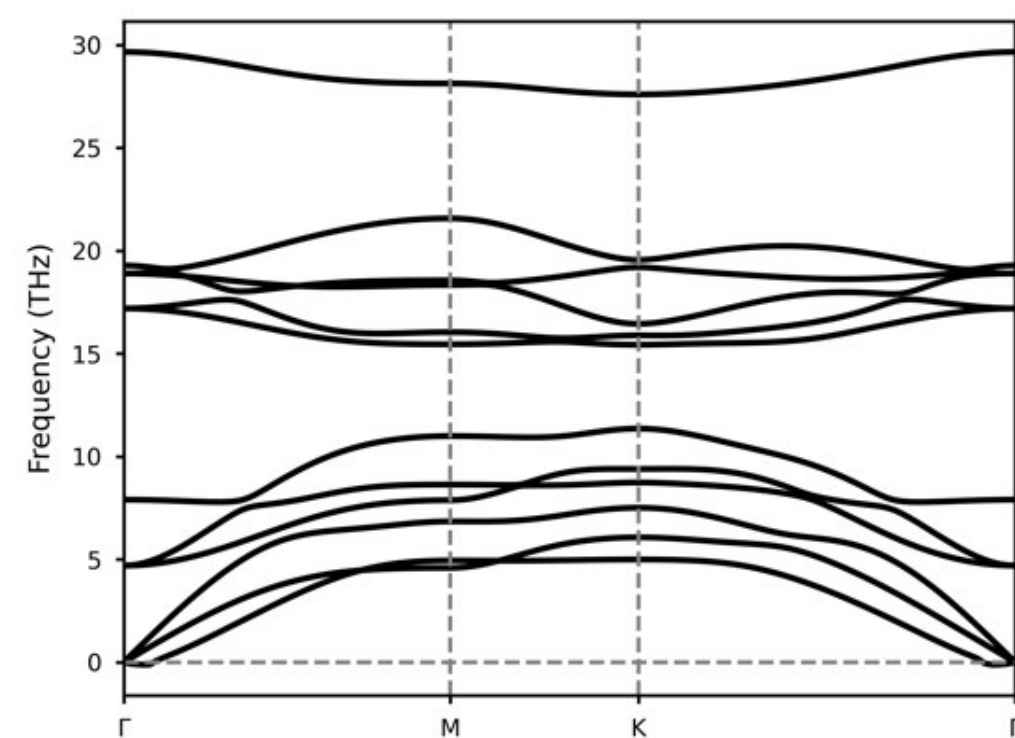

B<sub>2</sub>SeS

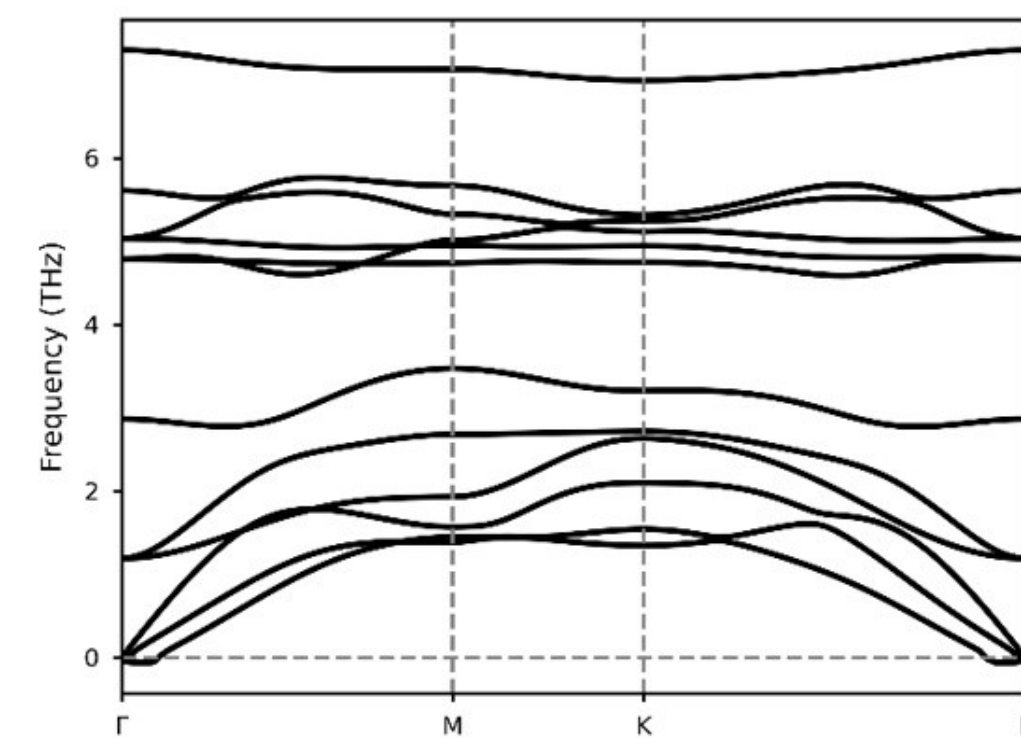

InGaTeSe

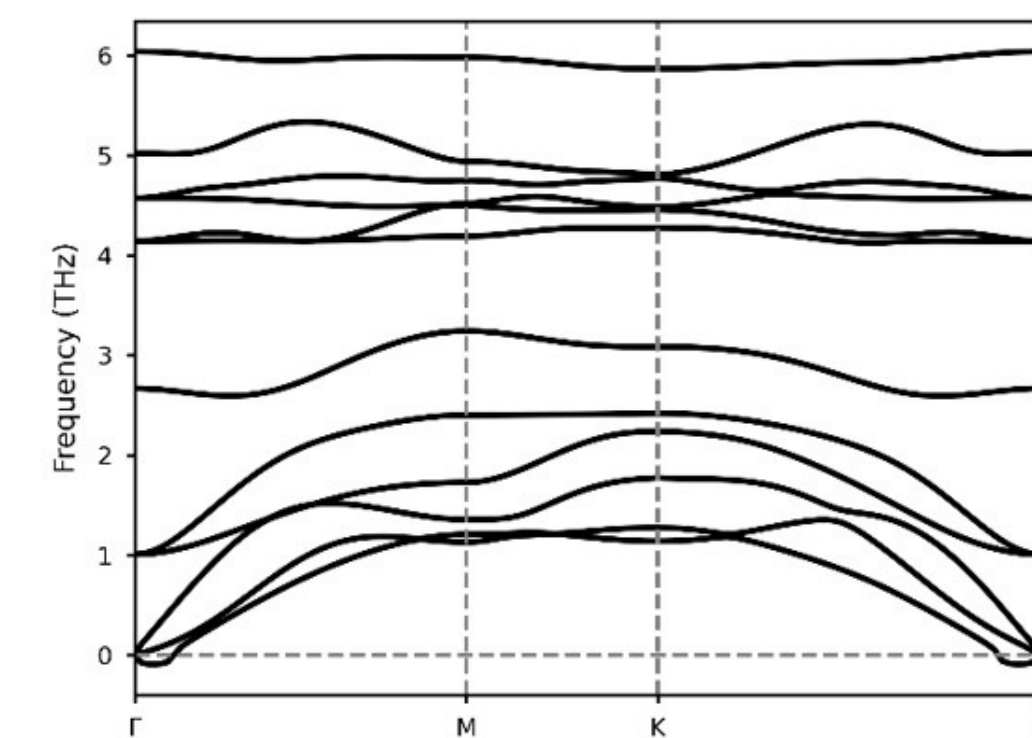

In<sub>2</sub>TeSe

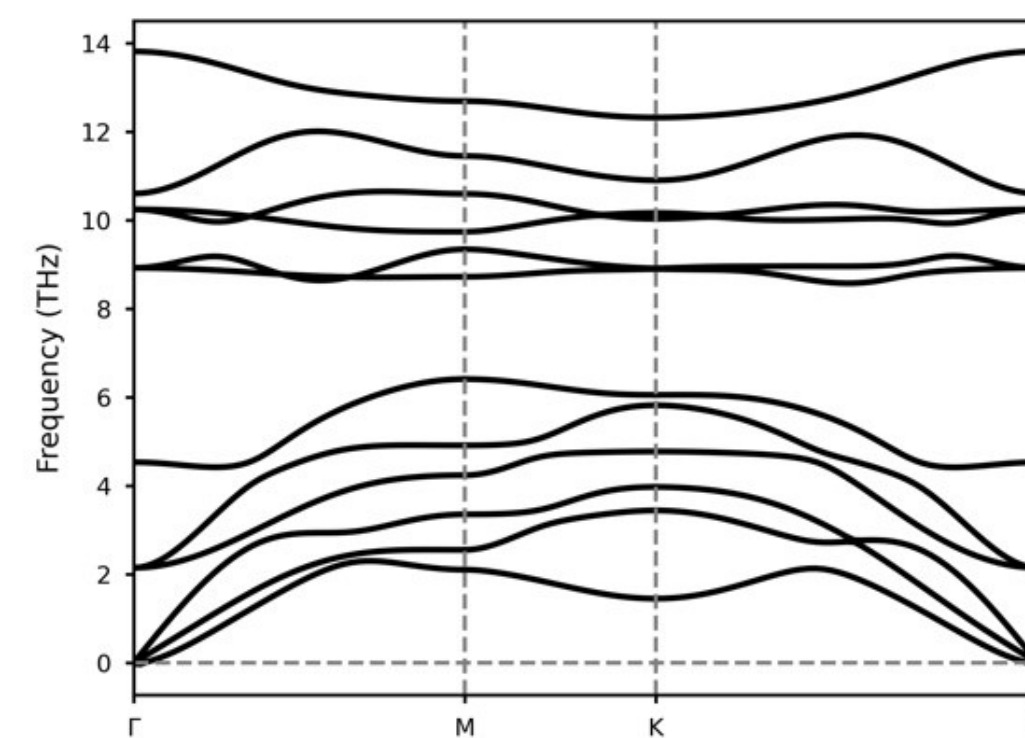

Al<sub>2</sub>SeS

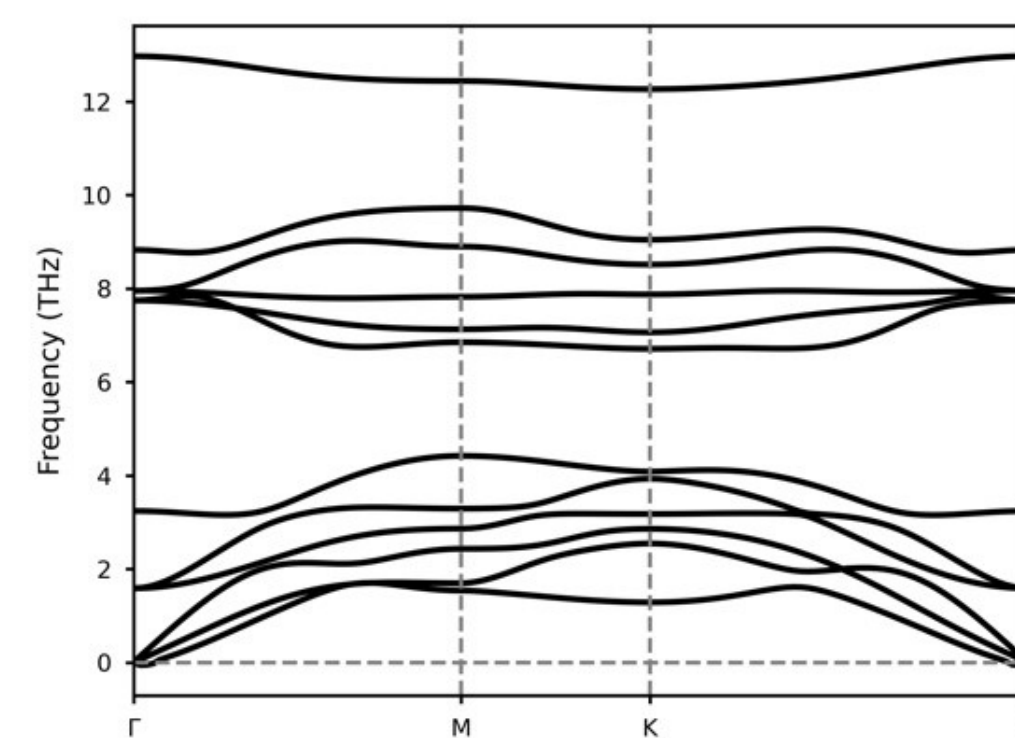

Al<sub>2</sub>TeSe

Supplement: d6cp00867d3.pdf [file d6cp00867d3.pdf]

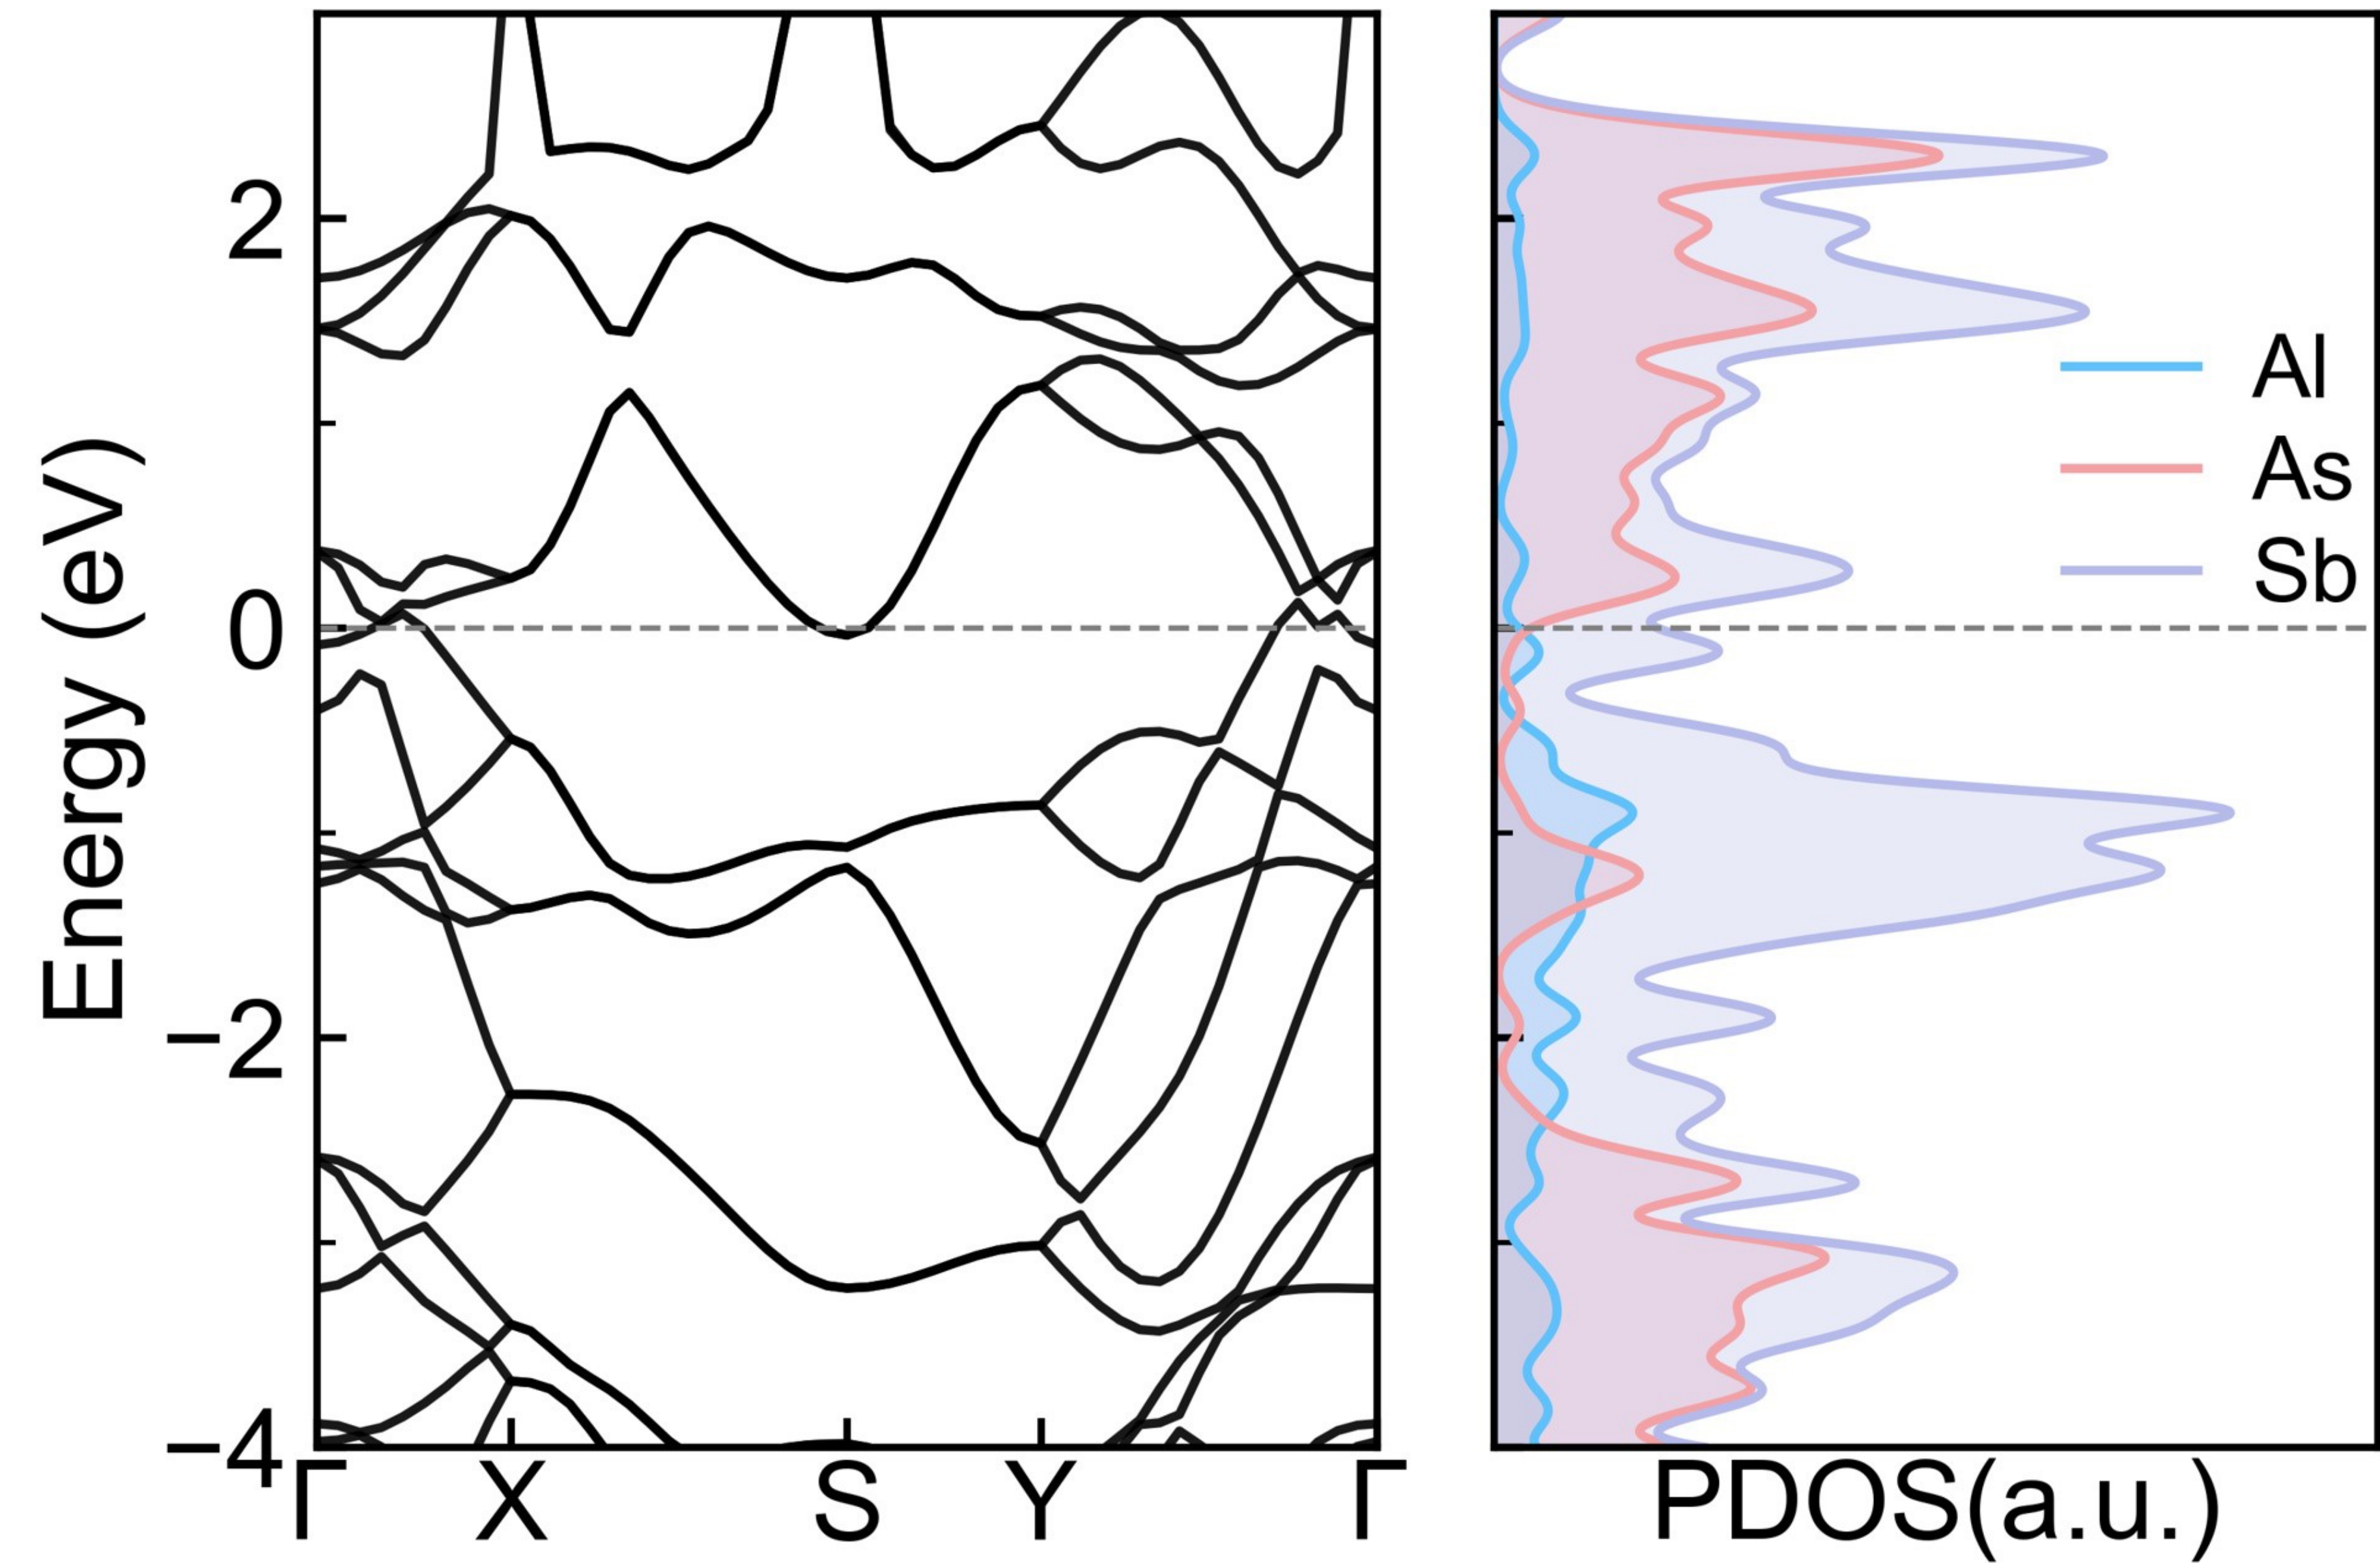

Supplement: d6cp00867d5.pdf [file d6cp00867d5.pdf]

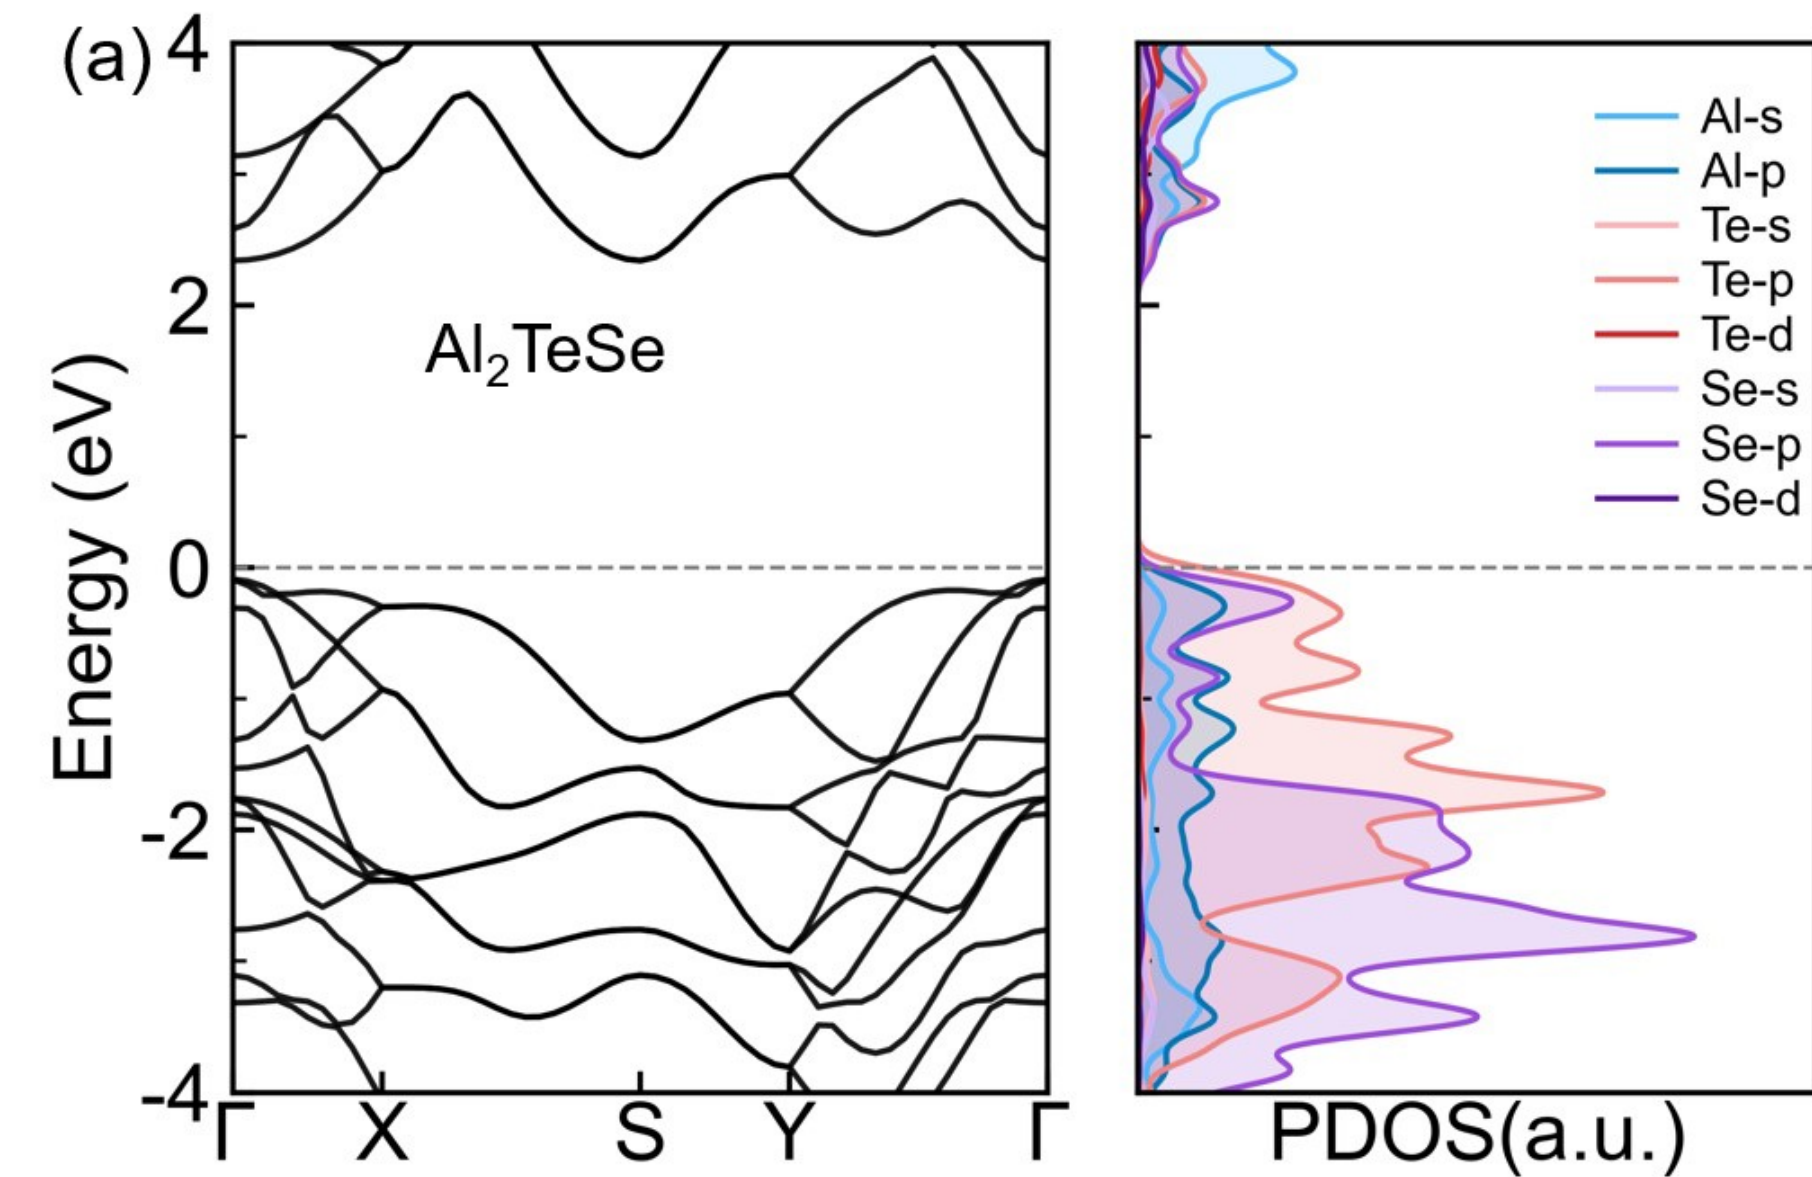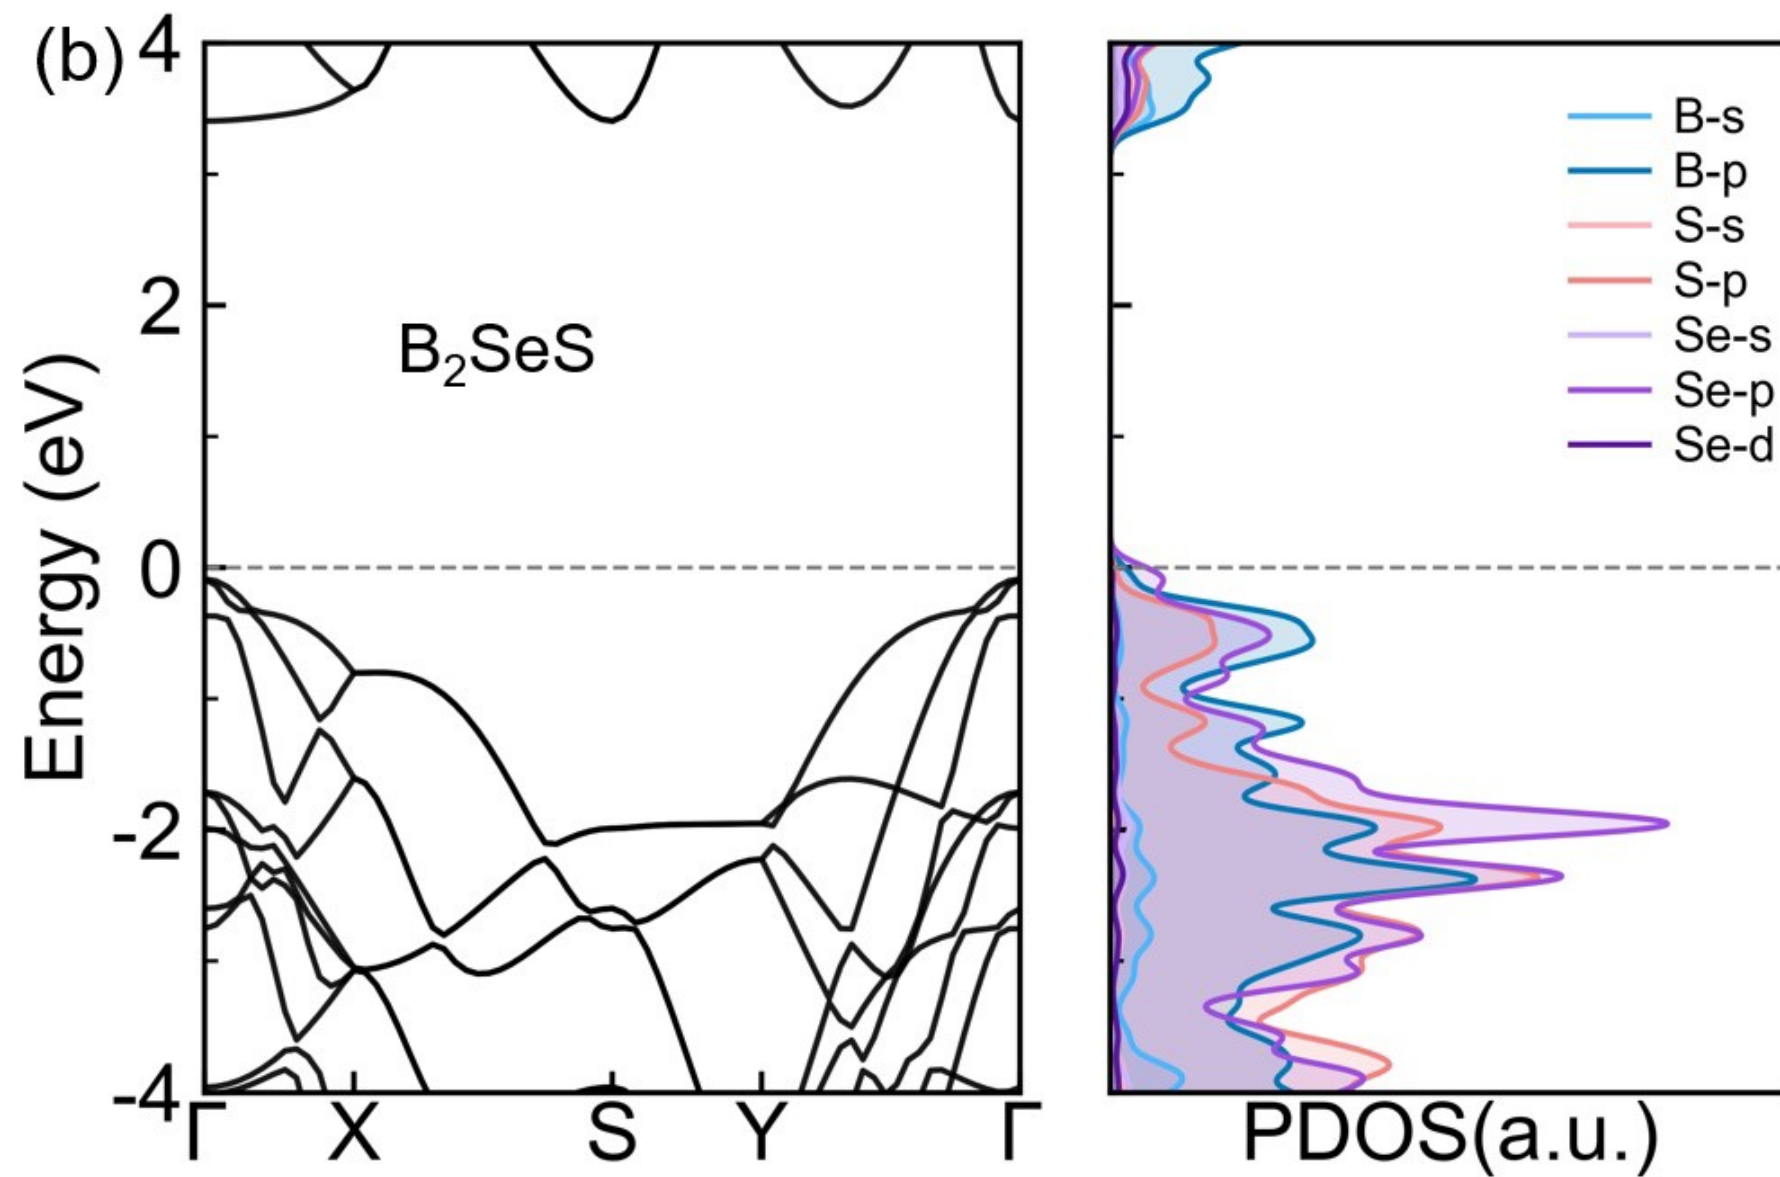

Supplement: d6cp00867d6.pdf [file d6cp00867d6.pdf]

### In<sub>2</sub>TeSe

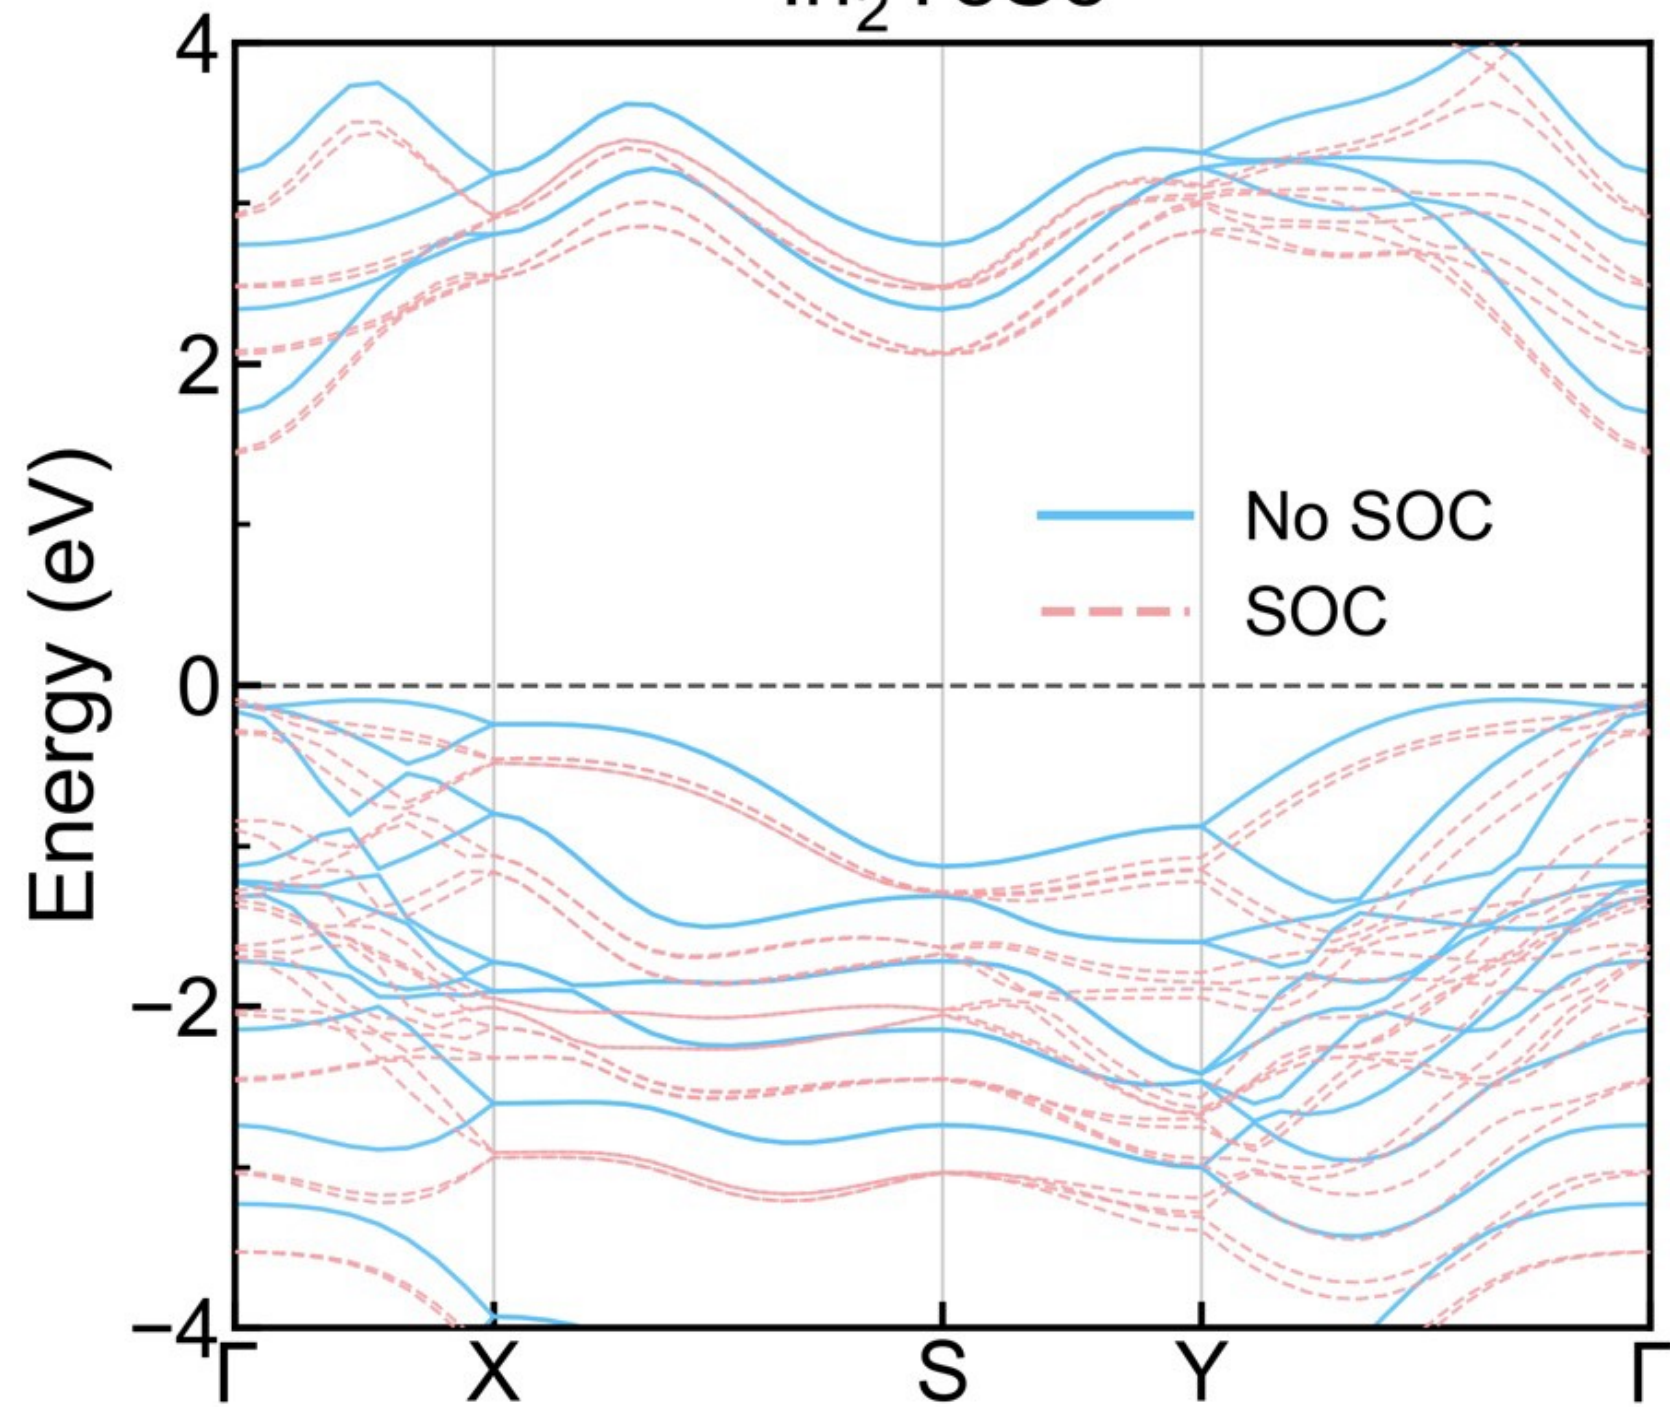

### InGaTeSe

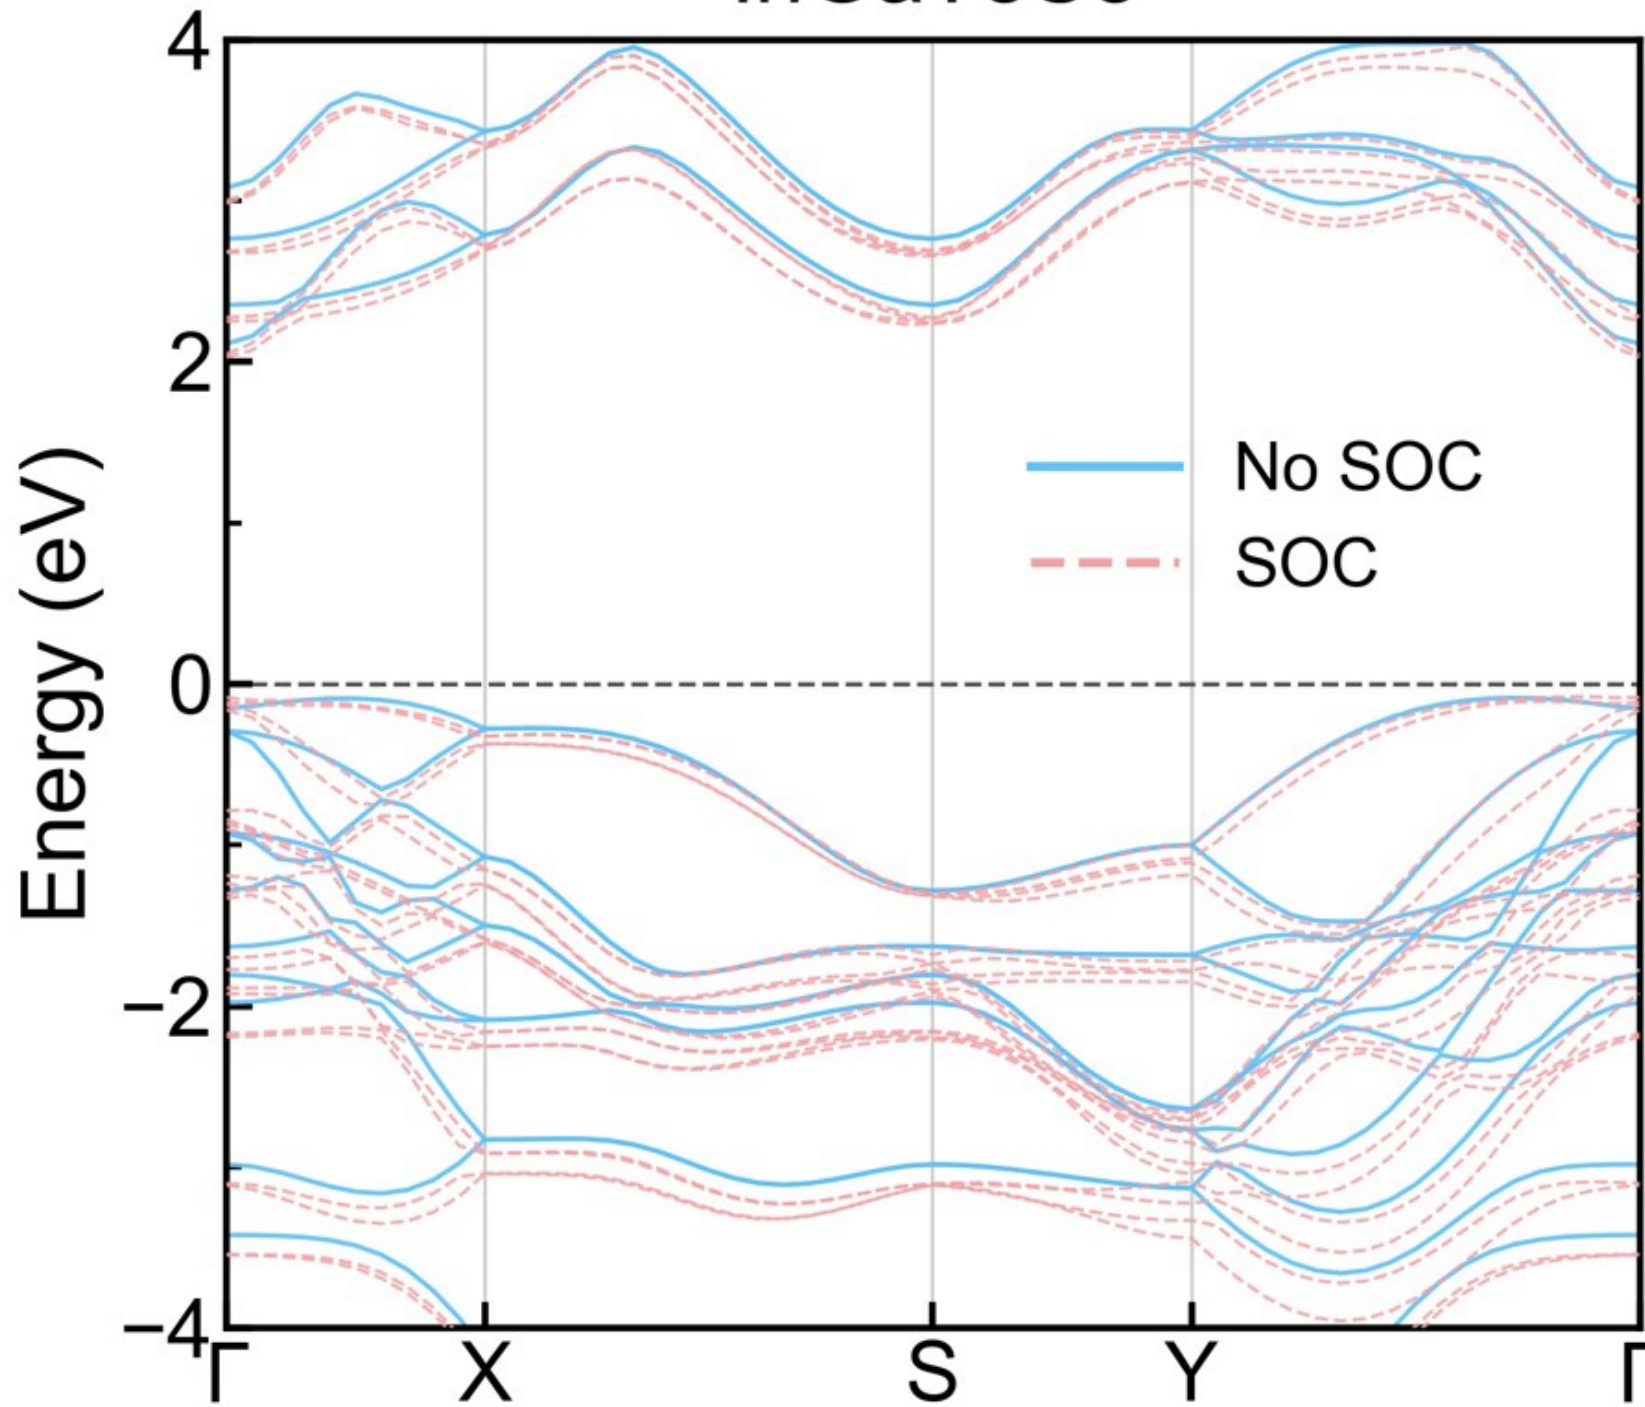

Supplement: d6cp00867d7.pdf [file d6cp00867d7.pdf]

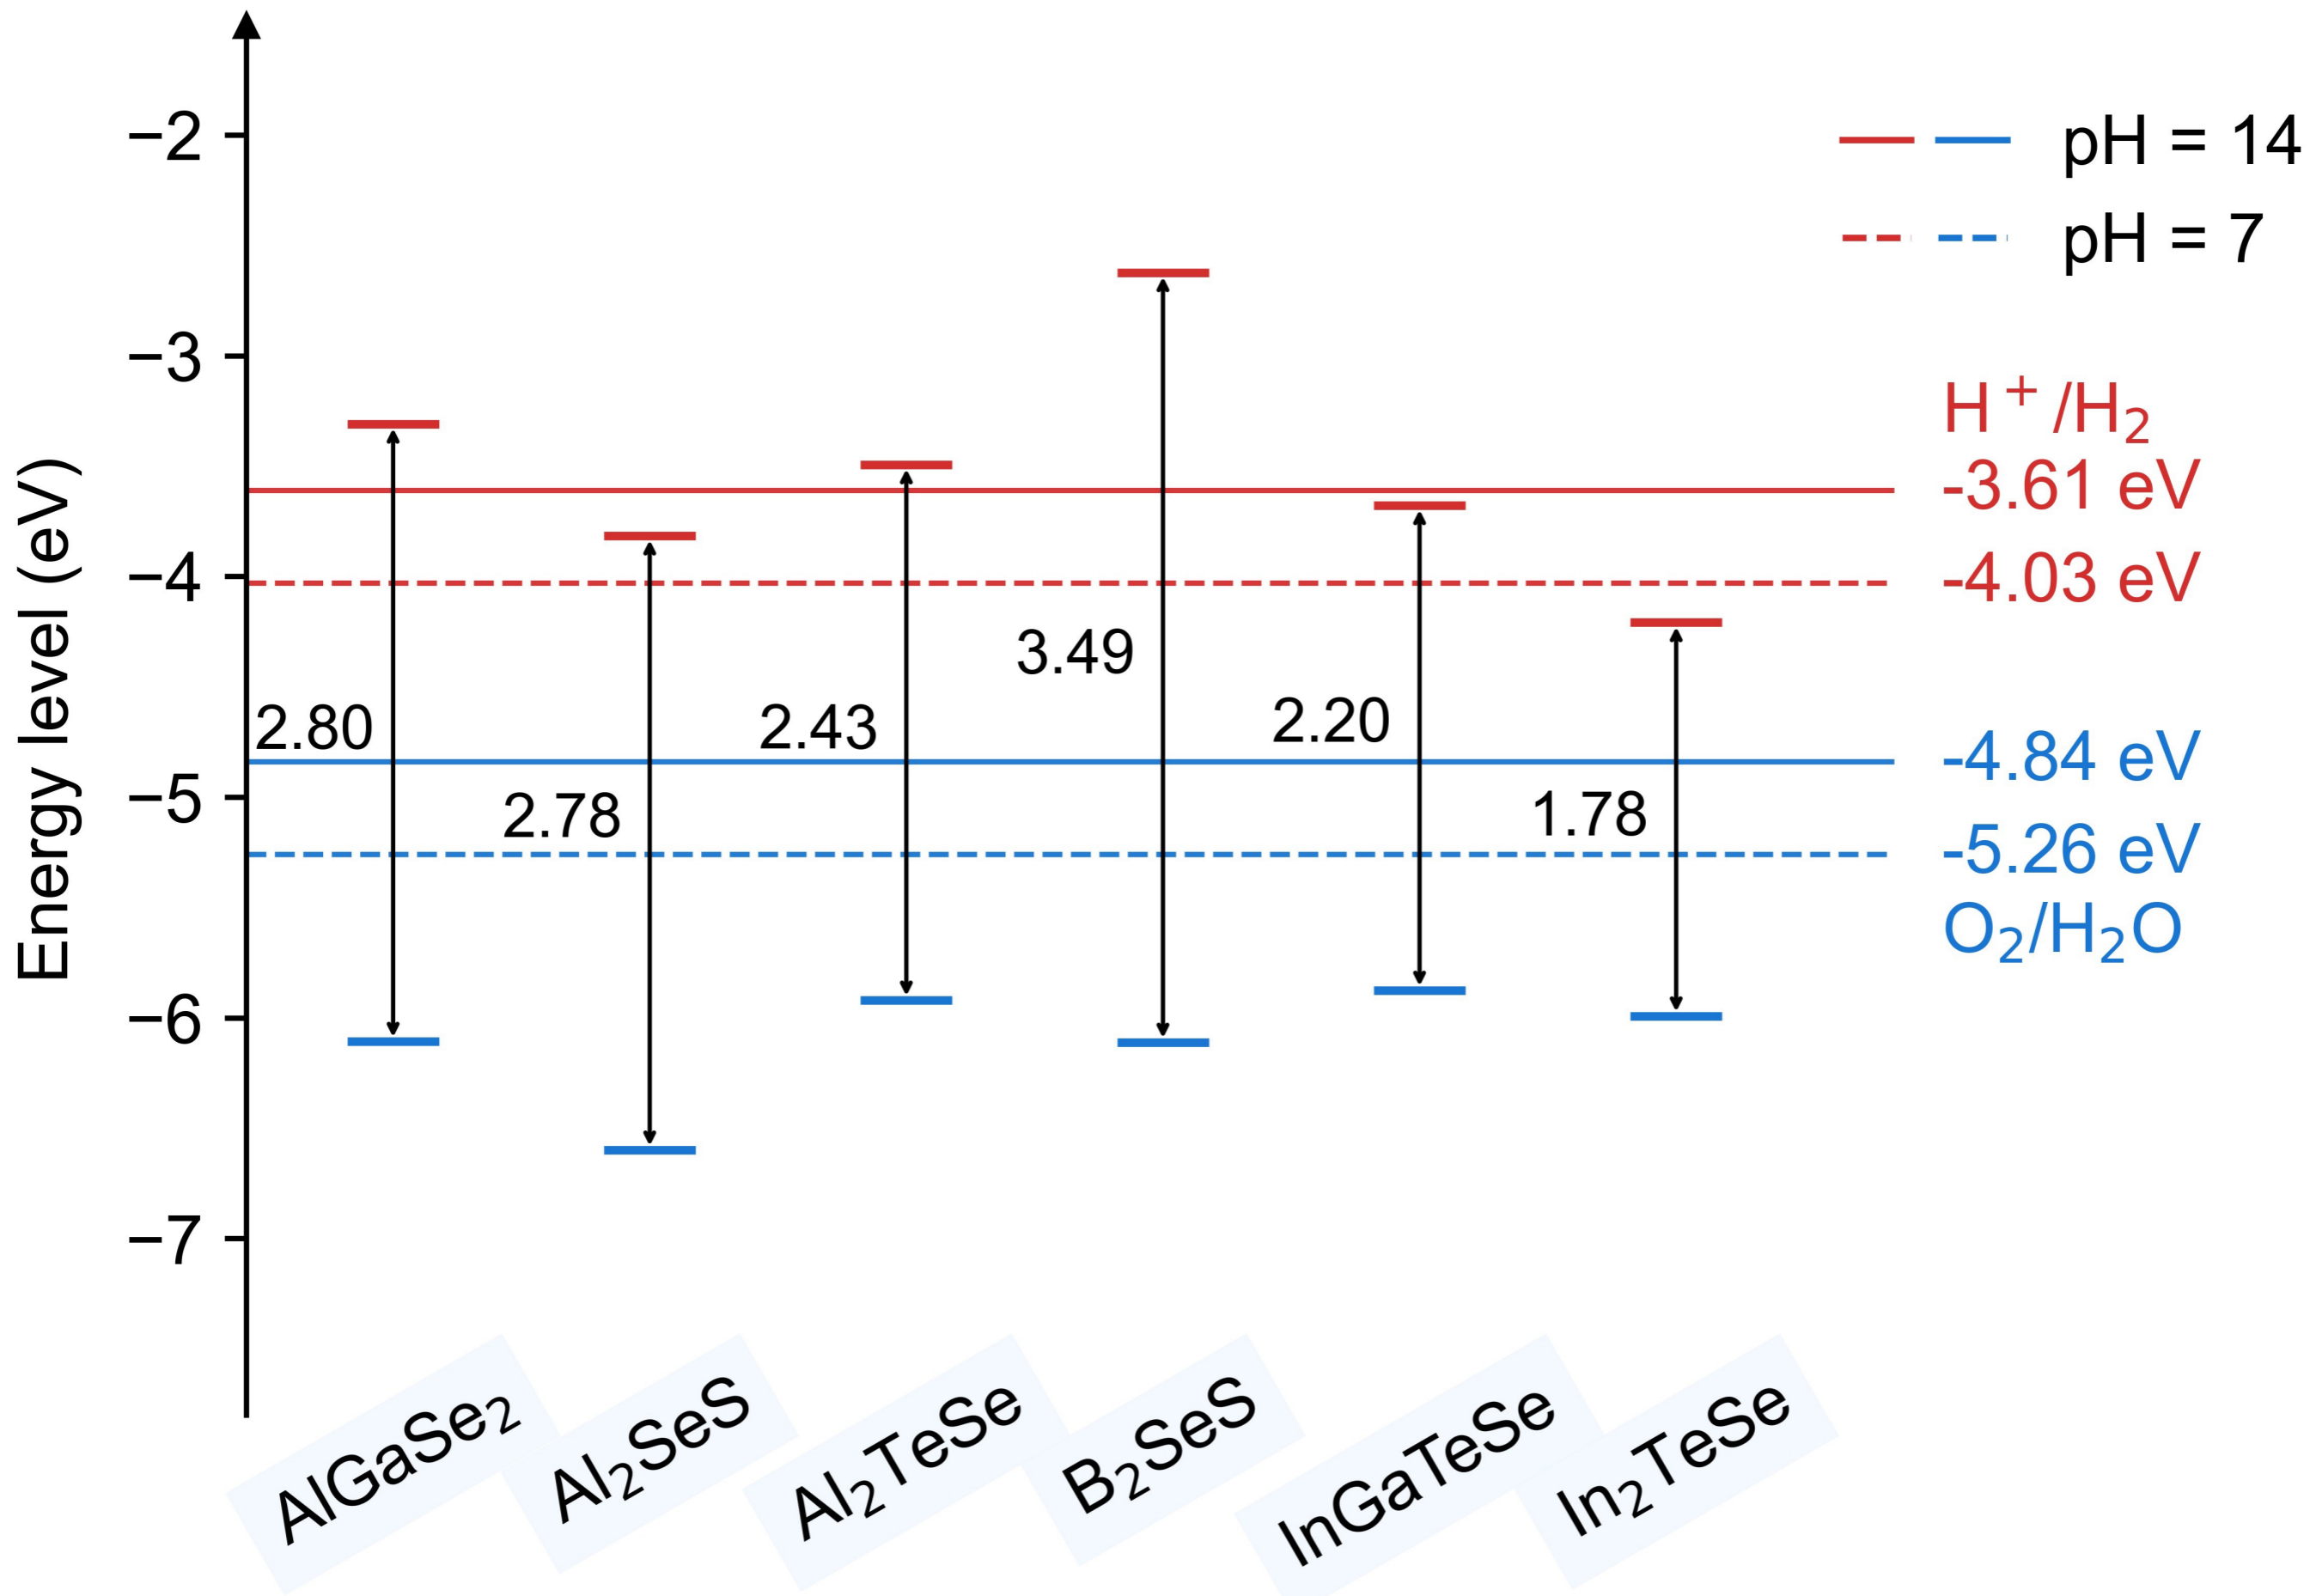

Supplement: d6cp00867d8.pdf [file d6cp00867d8.pdf]

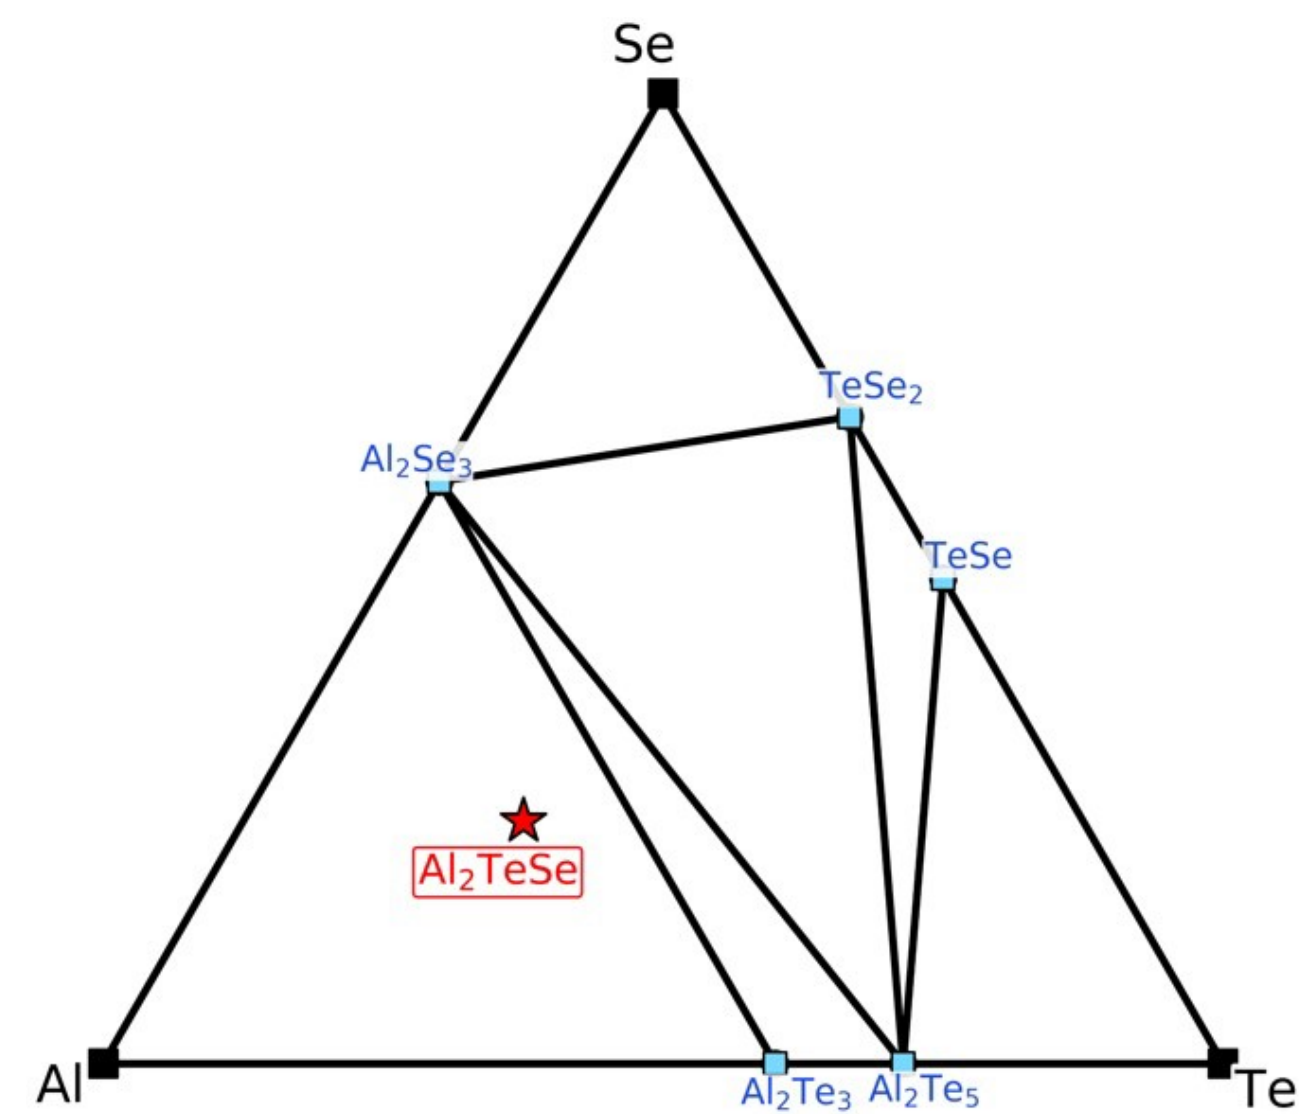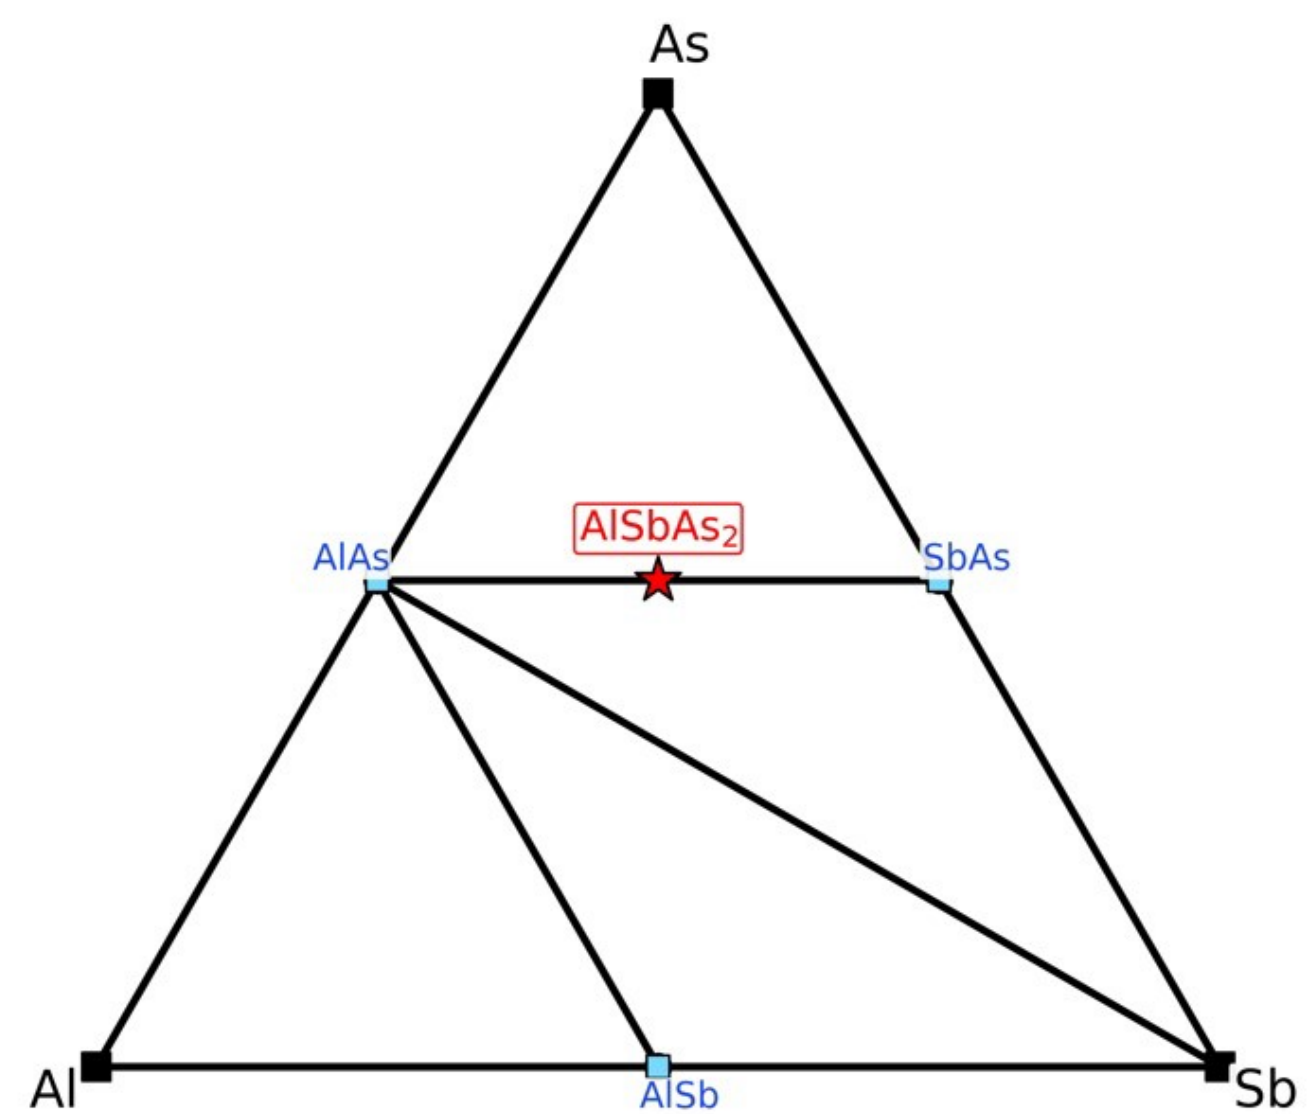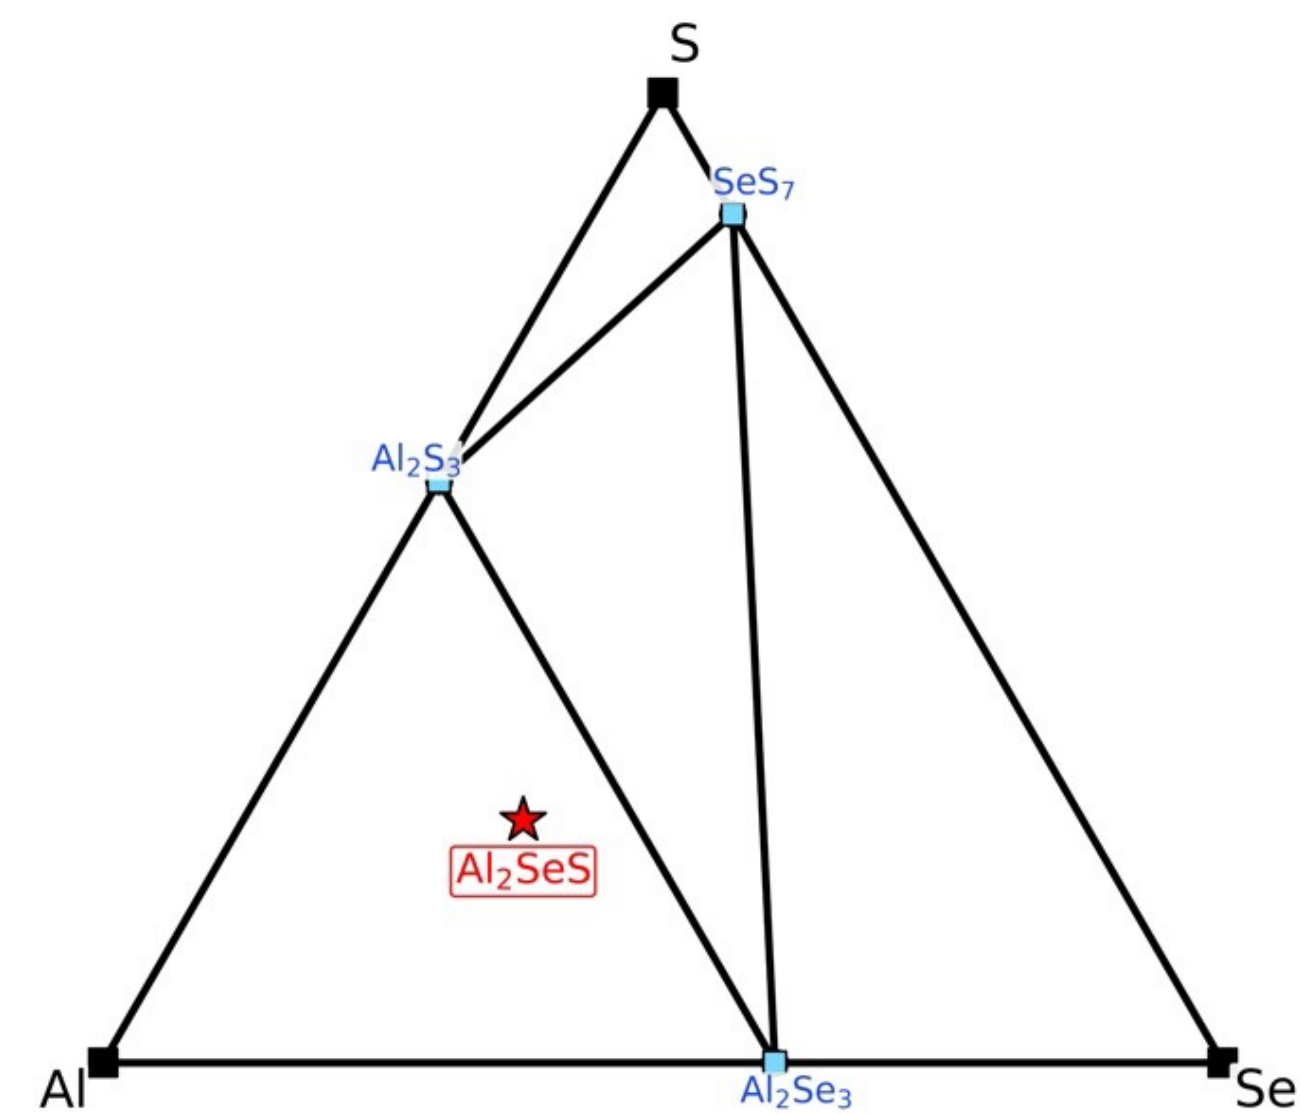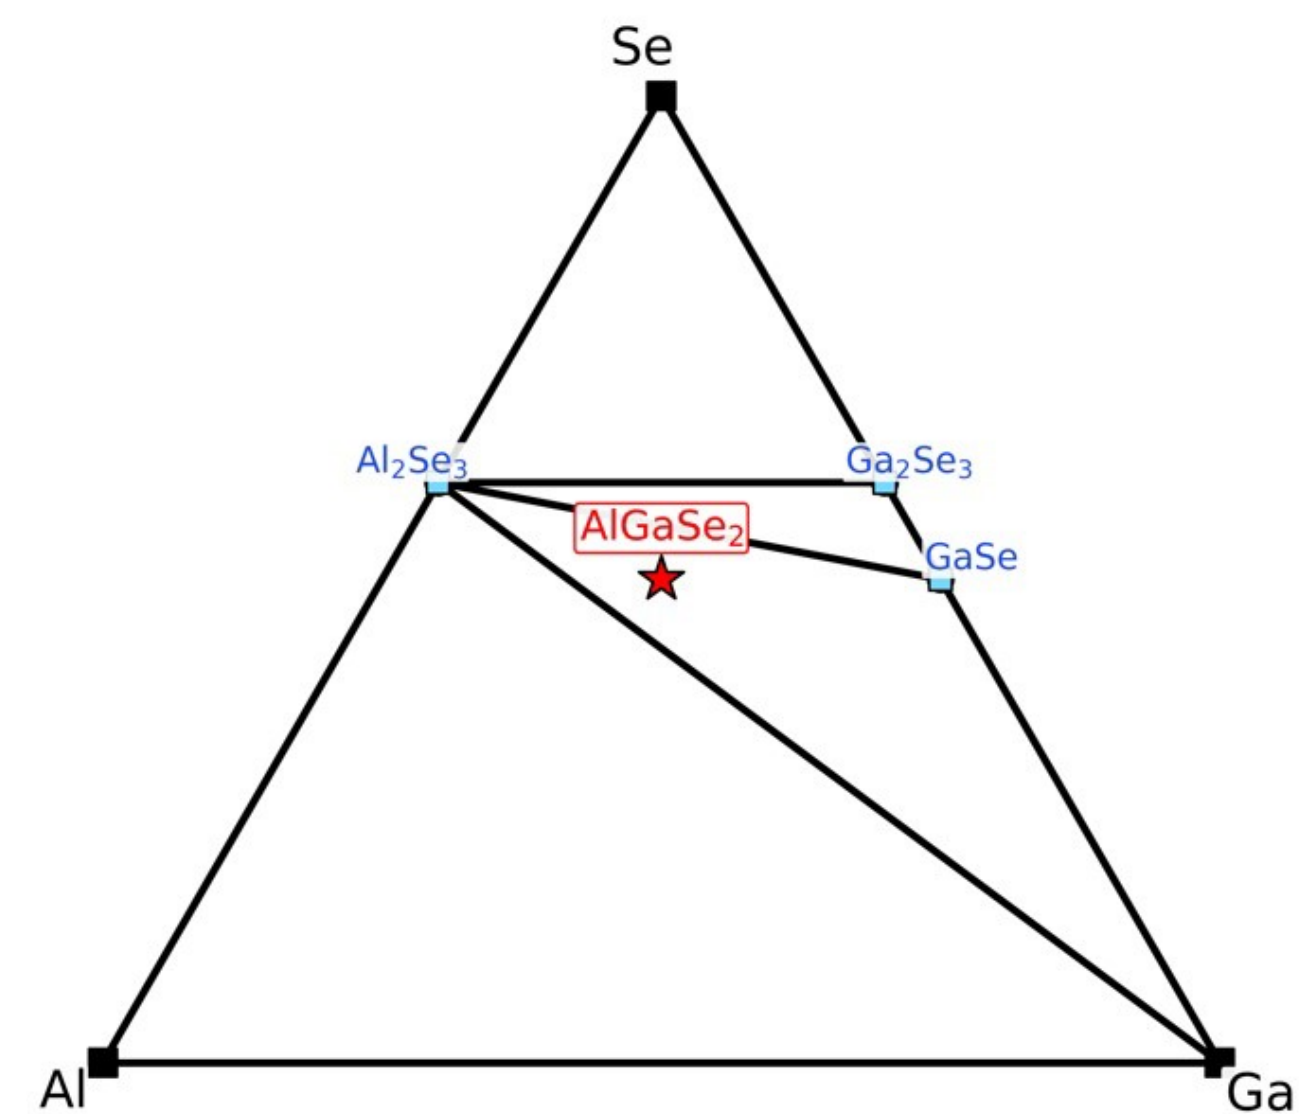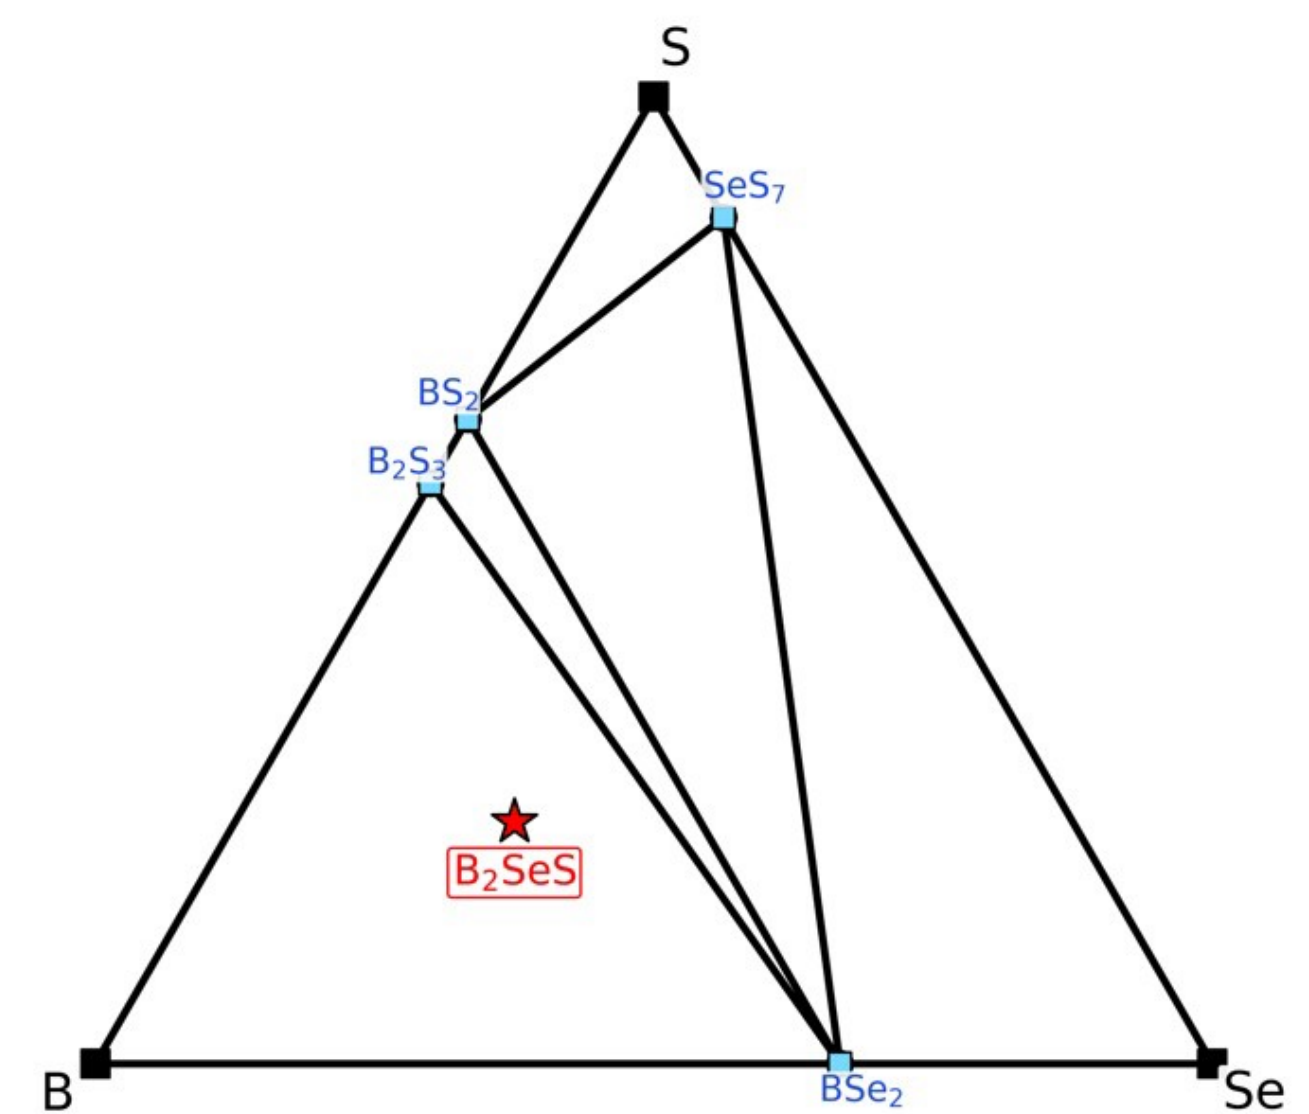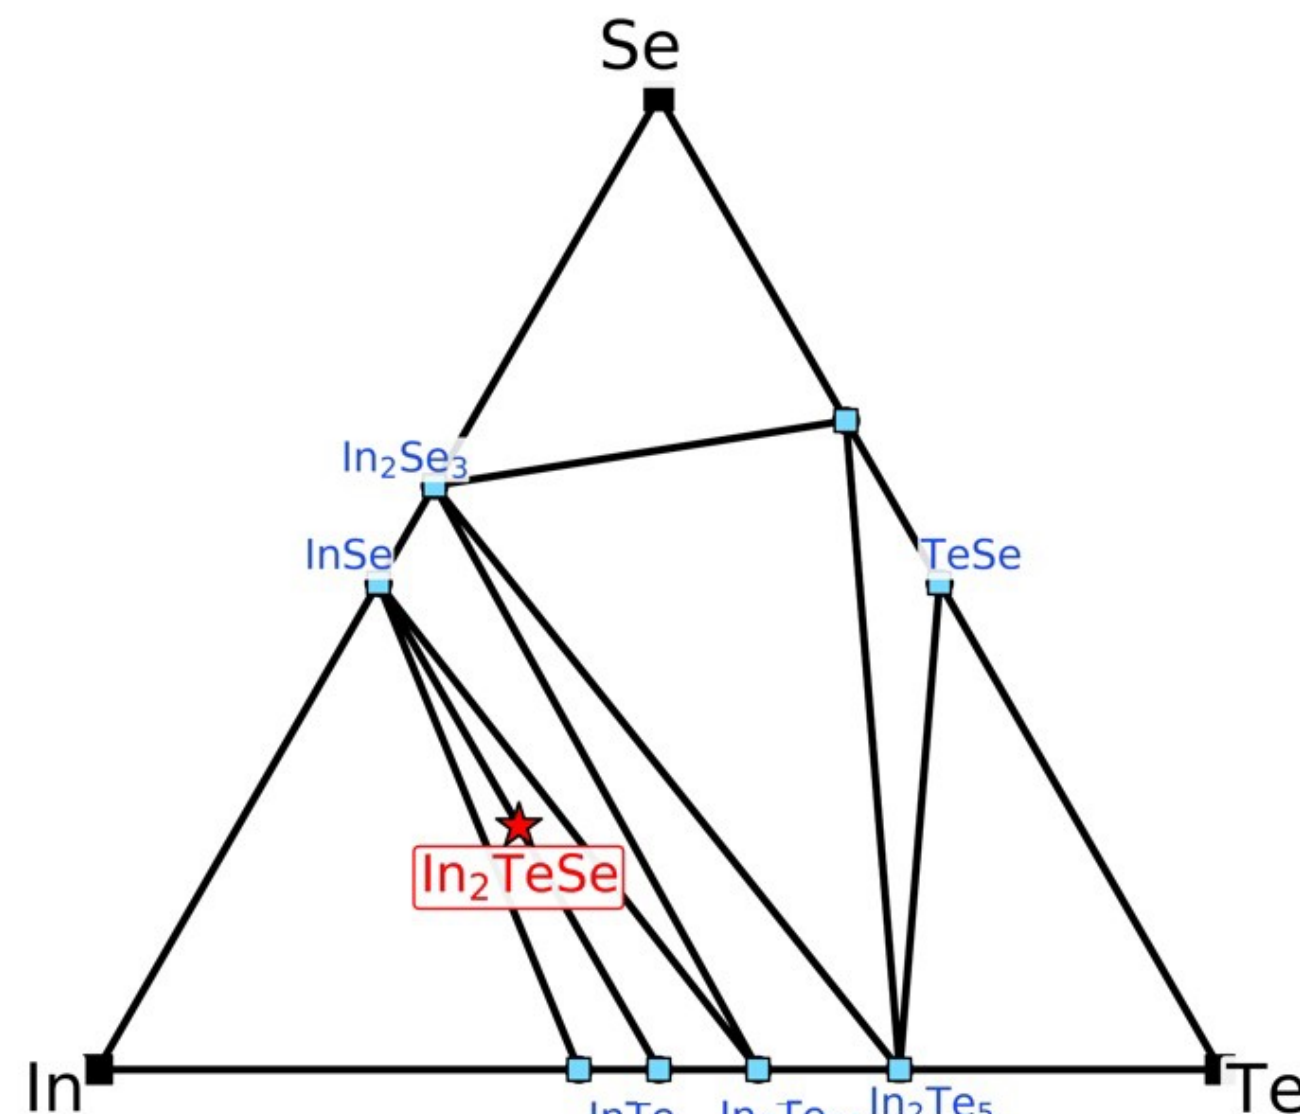

Supplement: d6cp00867d9.pdf [file d6cp00867d9.pdf]
